# Supplementary material for: Variability in the burden of disease estimates with or without age weighting and discounting: a methodological study
Source: PubMed Central journal article supplement — BMJ Open. 2019 Aug 18;9(8):e027825. doi: 10.1136/bmjopen-2018-027825 (PMC6701586; doi:10.1136/bmjopen-2018-027825), 2019-08-18

# BMJ Open

BMJ Open is committed to open peer review. As part of this commitment we make the peer review history of every article we publish publicly available.

When an article is published we post the peer reviewers' comments and the authors' responses online. We also post the versions of the paper that were used during peer review. These are the versions that the peer review comments apply to.

The versions of the paper that follow are the versions that were submitted during the peer review process. They are not the versions of record or the final published versions. They should not be cited or distributed as the published version of this manuscript.

BMJ Open is an open access journal and the full, final, typeset and author-corrected version of record of the manuscript is available on our site with no access controls, subscription charges or pay-per-view fees (<http://bmjopen.bmj.com>).

If you have any questions on BMJ Open's open peer review process please email [info.bmjopen@bmj.com](mailto:info.bmjopen@bmj.com)

# BMJ Open

## Years of life lost or years of potential life lost: Implications for the estimation of the burden of disease

|                               |                                                                                                                                                                                              |
|-------------------------------|----------------------------------------------------------------------------------------------------------------------------------------------------------------------------------------------|
| Journal:                      | <i>BMJ Open</i>                                                                                                                                                                              |
| Manuscript ID                 | bmjopen-2018-027825                                                                                                                                                                          |
| Article Type:                 | Research                                                                                                                                                                                     |
| Date Submitted by the Author: | 09-Nov-2018                                                                                                                                                                                  |
| Complete List of Authors:     | Egunsola, Oluwaseun; University of Sydney,<br>Raubenheimer, Jacques; University of Sydney, Discipline of Pharmacology<br>Buckley, Nicholas; University of Sydney, Discipline of Pharmacology |
| Keywords:                     | EPIDEMIOLOGY, PUBLIC HEALTH, Health economics < HEALTH SERVICES ADMINISTRATION & MANAGEMENT                                                                                                  |
|                               |                                                                                                                                                                                              |

SCHOLARONE™  
Manuscripts

1  
2  
3  
4  
5 **Years of life lost or years of potential life lost: Implications for the**  
6 **estimation of the burden of disease**  
7  
8  
9  
10  
11

12 Oluwaseun Egunsola, Jacques Raubenheimer, Nicholas Buckley  
13  
14  
15

16  
17 Clinical Pharmacology and Toxicology Research Group, Discipline of Pharmacology, The  
18 University of Sydney, NSW, Australia.  
19  
20  
21  
22  
23  
24  
25  
26  
27  
28  
29  
30  
31  
32

33 **Corresponding author** – Oluwaseun Egunsola: Clinical Pharmacology and Toxicology  
34 Research Group, Discipline of Pharmacology, Level 3, 1-3 Ross Street, School of Medical  
35 Sciences, Sydney Medical School, The University of Sydney, NSW, Australia, 2006  
36  
37  
38

39 **E-mail address** – oluwaseun.egunsola@sydney.edu.au  
40  
41

42 **Telephone no** - +61 (0) 286276626  
43  
44  
45

46 **Word count:** 2226  
47  
48  
49  
50  
51  
52  
53  
54  
55  
56  
57  
58  
59  
60

## ABSTRACT

**Objectives:** The years of life lost (YLL) and the years of potential life lost (YPLL) measures were developed in order to quantify the burden of premature deaths on the society. This study examines the impact of the type of method used on the estimation of the burden of diseases.

**Design:** Four metrics of burden of disease estimation namely; YPLL, non-age weighted YLL without discounting, and YLL with uniform or non-uniform age weighting and discounting were used to calculate the burden of selected diseases in three countries: Australia, USA and South Africa. Mortality data was obtained from the World Health Organisation (WHO) database. For each metric, the burden of disease was standardised as a percentage of the total national burden of disease.

**Results:** There were variations in the burden of disease estimates with the four methods. The standardised YPLL estimates were higher than other methods of calculation for diseases common among young adults and lower for diseases common among the elderly. In all three countries, the standardised burden of diseases common among young adults increased after non-uniform age weighting, compared to the decrease observed with diseases of the elderly.

**Conclusions:** Given the variability in the estimates of the burden of disease with different approaches, a single measure of the burden of disease should not be the only criterion for prioritising health or research funding.

## STRENGTHS AND LIMITATIONS OF THIS STUDY

1. This study highlights how the choice of burden of disease estimates affect the relative importance of selected diseases in three countries.
2. We have examined the diseases based on the ICD-10 broad categorisation; therefore our estimations have not examined the diseases at a granular level.
3. In the absence of an objective disease selection process, we have selected the diseases based on three crude age categories.

## INTRODUCTION

The metric for estimating the health status of a population has traditionally been the mortality rate. However, in order to identify and prioritise the causes of premature death, as well as quantify the burden of such deaths on the society, the years of life lost (YLL) and the years of potential life lost (YPLL) measures were developed. Both metrics estimate the average number of years a person would have lived had they not died prematurely. Governments and institutions use these metrics to prioritise health funding and research. The years of life lost concept has been in existence since the 1940s.[1] However, it did not gain traction as a planning tool for health promotion and disease prevention until the 1970s and 1980s.[2] The use of YPLL as a measure of premature mortality was introduced by the US Centres for Disease Control (CDC) in 1982, when they started reporting potential years of life lost before the age of 65.[3] YLL as a component of the Disability-Adjusted Life Year was introduced by the global burden of disease (GBD) study published in 1996.[4]

Although the two measures are somewhat similar with respect to what they measure, they differ in the calculations used. For YLL, the number of deaths at a particular age is multiplied by the standard life expectancy at the age at which death occurs. The results for the respective ages or age bands are then summed.[5] Methods of YPLL estimation have differed slightly between authors, but all involved the multiplication of the number of deaths for a particular age by the number of life years remaining for the age, with the subsequent summation of the estimates for all the ages.[6] Deaths beyond a cut-off age, usually the life expectancy in a specific population, are not measurable with YPLL. Furthermore, time-based discounting and age weighting are not incorporated into YPLL calculations. For YLL however, time-based discounting and age weighting may be incorporated. Discount rates have been considered useful for cost-effectiveness analyses, and are used to estimate the net present value of years of life lost. The GBD study for example, utilised a discount rate of 3% time of life lost in the future. Which

1  
2  
3 implies that a year of healthy life gained next year is worth 3% less than healthy life lived  
4  
5 now.[5] Discount rates of up to 5% have been used in cost effectiveness analyses.[7]  
6  
7

8 It is important that proportionate amounts of resources are allocated to disease research and  
9  
10 prevention. How the burden of one disease is perceived relative to others depend on the metric  
11  
12 used and whether adjustments were made to those metrics. In this report, we examine the  
13  
14 impact of the choice of index (YLL or YPLL), age weighting, and discounting on the estimation  
15  
16 of the burden of diseases.  
17  
18

## 19 20 21 **METHODS**

22  
23 The 2014 mortality data for three countries, Australia, USA and South Africa, were obtained  
24  
25 from the World Health Organisation (WHO) database. The WHO mortality database contains  
26  
27 mortality data by country, year, age, sex and cause of death, submitted to the WHO by its  
28  
29 member states on an annual basis since 1950. The causes of death on the database are coded  
30  
31 according to the International statistical Classification of Diseases and health related problems  
32  
33 10th revision (ICD-10).[8] Ten diseases, grouped into three categories were selected. The first  
34  
35 group consists of ischemic heart disease, cerebrovascular disease, Alzheimer's disease and  
36  
37 heart failure. These were diseases with peak mortality after life expectancy. The second group  
38  
39 were diseases with peak mortality in younger adults. These include: poisoning, land transport  
40  
41 accidents (LTA) and intentional self-harm. A third group consisted of diseases including lung  
42  
43 cancer, colorectal cancer and breast cancer, with peak mortality after age 50 but before age of  
44  
45 life expectancy (Figure 1 and see Supplementary files 1 and 2). The number of deaths in five-  
46  
47 year age intervals (except for infants and elderly over 85 years old: 0,1–4, 5–9, 10–14, ... 80–  
48  
49 84, 85+) were extracted onto a Microsoft Excel worksheet and the standard life expectancies  
50  
51 for the average ages of deaths for both males and females were obtained from the abridged  
52  
53  
54  
55  
56  
57  
58  
59  
60

WHO standard life table.[9] YLL was calculated, using Microsoft Excel, from the sum of the number of deaths due to a disease multiplied by life expectancy for that age band.

$$YLL = N * L$$

Where:

N = Number of deaths at a particular age or age band and L is the standard life expectancy for the age or age band of death.

Four metrics were compared:

- Years of potential life lost: YPLL,
- YLL without age weighting or discounting: YLL
- YLL with non-uniform age weighting: YLL (nuWT & Disc)
- YLL with uniform age weighting and discounting: YLL (uWT & Disc)

Details of the method for calculating non-uniform age weighted (K=1) and non-zero discounted; as well as 3% discounted and uniform age weighted (K=0) YLL are available in the WHO practical guide for national burden of disease studies.[10] To enable comparison, YPLL were calculated by multiplying the number of disease-specific deaths for a given age group by the expected life at the mid-point for each age group up to a cut off age of 79 years by using the formula:  $YPLL = \sum_x D_x(79-A_x)$

Where  $D_x$  = registered number of deaths at age due to a particular cause of death

$A_x$  = adjusted age at death

For each method, the burden of disease was standardised as a percentage of the total national burden of disease, i.e.



1  
2  
3 Standardised burden of disease = (Burden of disease/total burden of diseases) 100  
4  
5  
6  
7

## 8 9 **RESULTS**

10  
11  
12 There were variations in the contributions of each disease class to the total national burden of  
13 disease in the selected countries, with the four methods of estimation (Figure 2). In all three  
14 countries, burden of disease estimation with YPLL yielded the highest estimates for diseases  
15 common among younger adults, resulting in a higher contribution of these diseases to the total  
16 burden of disease in the respective countries (Figures 3–5). In Australia, the standardised  
17 burden of intentional self-harm was 9.3% with YPLL, compared to 5.6%, 6.5% and 4.3% with  
18 YLL, YLL (nuWT & Disc) and YLL (uWT & Disc) respectively. The impact of utilising YPLL  
19 was much lower for South Africa, with only marginal differences from the other three methods  
20 observed (Figure 5). YPLL resulted in the lowest estimate of disease burden for diseases  
21 common among the elderly. In the USA, the standardised burden of ischemic heart disease was  
22 9.4% compared to 11.6%, 10.7% and 12.6%, with YLL, YLL (nuWT & Disc) and YLL (uWT  
23 & Disc), respectively (Figure 4).

24  
25  
26  
27  
28  
29  
30  
31  
32  
33  
34  
35  
36  
37  
38  
39  
40 In the three countries, age weighting increased the contributions of diseases common among  
41 younger adults to the total burden of disease; while the contributions of diseases of the elderly  
42 decreased (Figures 3–5). In Australia, the standardised burden of ischemic heart disease,  
43 cerebrovascular disease, heart failure and Alzheimer's disease decreased from 10.8% to 9.6%,  
44 5.1% to 4.3%, 1.1% to 0.8% and 1.4% to 1% respectively after age weighting; while the  
45 standardised burden of intentional self-harm, poisoning and land transport accidents increased  
46 from 4.3% to 6.5%, 3% to 4.3% and 1.9% to 3%, respectively after age weighting (Figure 3).  
47  
48  
49  
50  
51  
52  
53  
54  
55  
56  
57  
58  
59  
60

## DISCUSSION

We have shown that estimates of the relative burden of diseases are highly dependent on the methods of calculation used. This is especially so for countries with long life expectancy, and for diseases that preferentially affected the young or elderly. YPLL estimates were relatively higher for diseases common among younger adults and lower for diseases of the elderly, with YLL demonstrating opposite bias. Similarly, age weighting decreased the contribution of diseases of the elderly to the total burden of disease; while the contributions of diseases of younger adults were increased.

The variations in estimates of the burden of disease can change the relative importance of a disease; such that advocates and researchers interested in promoting research on particular diseases could choose an approach that best supports their cause. In our study, intentional self-harm was the most ‘burdensome’ of all the 10 diseases in Australia using YPLL estimates, ahead of ischemic heart disease, lung cancer and cerebrovascular disease. However, with the uniform weighted YLL with discount method, intentional self-harm decreased in relevance to the fourth most ‘burdensome’ disease. Gross et al.[11] showed a positive association between total mortality and the years of life lost from disease and the amount of research funding received from the US National Institutes of Health: While the incidence, prevalence and the number of hospital days attributed to a disease were not associated with the amount of funding, their study showed that research involving ischemic heart disease, stroke, and lung cancer—which were the first, second, and third leading causes of death, respectively, in the United States in 1994—were the most funded. The burden of disease is however usually not the only motivation for research funding. In 2005, non-communicable diseases and injuries accounted for about half and 9% of global disease burden respectively, but received 10% and 1% of WHO funding respectively.[12]

1  
2  
3 The WHO recommends that individual countries should report on their national burden of  
4 disease and they have provided resources on their website for these calculations. The resources  
5 provided are for YLL, which indicates a tacit preference for this method.[9] Some national  
6 agencies, including the Australian Bureau of Statistics and the US CDC, however, estimate the  
7 YPLL. There is currently no consensus on which approach is the most suitable for calculating  
8 YLL. Although the WHO has shown a preference for time-based discounting with age  
9 weighting,[5] some national burden-of-disease studies have included time discounting without  
10 age weighting;[13] while some other studies have utilised neither.[14] Melse et al., in  
11 evaluating the burden of disease in the Netherlands, justified their non-utilisation of age.  
12 weighting and time-based discounting as a practical way of maintaining transparency of  
13 figures.[14] Barendregts et al.[15] reported that the addition of age weights to discounted  
14 estimates, resulted in ages 0–27 years becoming more important than 9–54 years. Sensitivity  
15 analyses have been recommended to determine the implications of including or excluding time-  
16 based discounting and age weighting in the burden of disease estimates.[5] Although  
17 unweighted YLL without discount generally produced higher burden estimates than the three  
18 other methods for all 10 diseases (see Supplementary files 3-5), we have shown in this study  
19 that the adjusted values with this method were closer to age weighted YLL with discount. Both  
20 methods yielded results that were consistently between the two extremes of YPLL and uniform  
21 weighted YLL with discount (Figures 3–5).

22  
23 Furthermore, the propriety of age weighting and discounting is a controversial subject and  
24 different authors have argued for or against them. Notably, Murray and Acharya opined that  
25 age weighting should not be a social construct that is based on our relative desire to take care  
26 of children and the elderly, but rather a system premised on how productive an age group is  
27 and the need to prioritise their wellbeing.[16] Anand and Hanson argued that all lives are equal  
28 in importance and disagreed that people's lives should be valued in terms of their productivity.  
29  
30  
31  
32  
33  
34  
35  
36  
37  
38  
39  
40  
41  
42  
43  
44  
45  
46  
47  
48  
49  
50  
51  
52  
53  
54  
55  
56  
57  
58  
59  
60

1  
2  
3 They also suggested that discounting and weighting reduces the YLL in females relative to  
4 males.[17]  
5  
6

7  
8 Age weighting attaches different values to life years lived at different ages. Lower weights are  
9 usually given to years of healthy life at very young and old ages than for other ages. Time-  
10 based discounting is useful in health economics research; it is included in YLL calculation to  
11 reflect the preference on life years closer to the present. However, there are sociocultural factors  
12 worthy of consideration. For example, the decision as to whether a year of life gained now is  
13 worth more than one gained in 10 years will depend on societal perceptions of life, which can  
14 be very heterogeneous, especially in highly multicultural societies. Also, when an economic  
15 value is attached to a year of life lost, the total values can differ significantly depending on  
16 which method is used to calculate the number of years lost.  
17  
18  
19  
20  
21  
22  
23  
24  
25  
26  
27  
28  
29

30 Using YPLL to rank prematurity-related mortality also has its drawbacks. It does not account  
31 for deaths beyond the life expectancy for the country or beyond an arbitrarily selected cut-off  
32 age, essentially assigning no burden to death at older ages. Therefore, reporting YPLL often  
33 requires a reference to the age threshold against which the YPLL was calculated. YPLL  
34 therefore generally underestimates the years lost to disease common in old age. The gulf  
35 between YPLL and YLL estimates can be accentuated in countries with aging populations and  
36 ranking can also be tilted in favour of diseases that are common early in life.  
37  
38  
39  
40  
41  
42  
43  
44  
45

46 This study has several limitations. We have examined the diseases based on the ICD-10 broad  
47 categorisation. Therefore our estimations have not examined the diseases at a granular level.  
48 Comparing the burden of disease estimation for the individual diseases is complex in the  
49 absence of an objective selection process, however we have used three crude age categories to  
50 select the diseases.  
51  
52  
53  
54  
55  
56  
57  
58  
59  
60

1  
2  
3 In conclusion, the choice of appropriate metrics of disease burden is important for the  
4 prioritisation of research funding. Given the variability in the estimates of the burden of disease  
5 with different approaches, the burden of disease should not be the only criterion for prioritising  
6 health or research funding. Different metrics should be considered before resources are  
7 allocated.  
8  
9  
10  
11  
12  
13  
14  
15  
16  
17  
18  
19  
20  
21  
22  
23  
24  
25  
26  
27  
28  
29  
30  
31  
32  
33  
34  
35  
36  
37  
38  
39  
40  
41  
42  
43  
44  
45  
46  
47  
48  
49  
50  
51  
52  
53  
54  
55  
56  
57  
58  
59  
60

For peer review only

1  
2  
3  
4  
5  
6 **Competing interests:** The authors declare that they have no competing interests  
7  
8

9 **Funding statement:** This work was supported by the National Health and Medical Research  
10 Council (NHMRC) through the Translational Australian Clinical Toxicology Program (TACT)  
11 (grant ID1055176).  
12  
13  
14

15  
16 **Authors' contributions:** OE and NB conceptualised and designed the study. OE and JR  
17 analysed the data. OE wrote the initial draft of the manuscript. JR and NB critically reviewed  
18 the manuscript. All authors read and approved the final manuscript.  
19  
20  
21  
22  
23  
24  
25  
26  
27  
28  
29  
30  
31  
32  
33  
34  
35  
36  
37  
38  
39  
40  
41  
42  
43  
44  
45  
46  
47  
48  
49  
50  
51  
52  
53  
54  
55  
56  
57  
58  
59  
60

## REFERENCES

1. Haenszel W. A standardized rate for mortality defined in units of lost years of life. *Am J Public Health Nations Health* 1950;40(1):17-26.
2. Perloff JD, LeBailly SA, Kletke PR, et al. Premature death in the United States: years of life lost and health priorities. *J Public Health Policy* 1984;5(2):167-84.
3. Centers for Disease Control. Introduction to Table V. Premature deaths, monthly mortality, and monthly physician contacts--United States. *MMWR Morbidity and mortality weekly report* 1982;31(9):109.
4. Murray CJ, Lopez AD. The global burden of disease: a comprehensive assessment of mortality and disability from diseases, injuries, and risk factors in 1990 and projected to 2020: summary. 1996. [http://apps.who.int/iris/bitstream/handle/10665/41864/0965546608\\_eng.pdf;jsessionid=F433BAA2B578778497A8B96C097FA61B?sequence=1](http://apps.who.int/iris/bitstream/handle/10665/41864/0965546608_eng.pdf;jsessionid=F433BAA2B578778497A8B96C097FA61B?sequence=1) (accessed 22 May 2018).
5. Prüss-Üstün A, Mathers C, Corvalán C, et al. Introduction and methods: assessing the environmental burden of disease at national and local levels. 2003; (1). [http://www.who.int/quantifying\\_ehimpacts/publications/en/9241546204.pdf](http://www.who.int/quantifying_ehimpacts/publications/en/9241546204.pdf) (accessed 14 June 2018).
6. Gardner JW, Sanborn JS. Years of potential life lost (YPLL)—what does it measure? *Epidemiology* 1990:322-29.
7. Siegel JE, Weinstein MC, Russell LB, et al. Recommendations for reporting cost-effectiveness analyses. *JAMA* 1996;276(16):1339-41.
8. World Health Organization. Health statistics and information systems: WHO Mortality database [Available from: [http://www.who.int/healthinfo/mortality\\_data/en/](http://www.who.int/healthinfo/mortality_data/en/) accessed 21 Jul 2017.
9. World Health Organisation. Health statistics and information systems: National tools 2017 [Available from: [http://www.who.int/healthinfo/global\\_burden\\_disease/tools\\_national/en/](http://www.who.int/healthinfo/global_burden_disease/tools_national/en/) accessed 21 Jul 2017.
10. Mathers CD, Vos T, Lopez AD, et al. National burden of disease studies: a practical guide. Edition 2.0 ed: Geneva: World Health Organization, 2001.
11. Gross CP, Anderson GF, Powe NR. The relation between funding by the National Institutes of Health and the burden of disease. *N Engl J Med* 1999;340(24):1881-87.
12. Stuckler D, King L, Robinson H, et al. WHO's budgetary allocations and burden of disease: a comparative analysis. *The Lancet* 2008;372(9649):1563-69.
13. Phua HP, Chua AV, Ma S, et al. Singapore's burden of disease and injury. *Singapore Med J* 2009;50(5):468-78.

- 1  
2  
3 14. Melse JM, Essink-Bot M-L, Kramers P, et al. A national burden of disease calculation:  
4 Dutch disability-adjusted life-years. Dutch Burden of Disease Group. *Am J Public*  
5 *Health* 2000;90(8):1241.  
6  
7 15. Barendregt JJ, Bonneux L, Van der Maas P. DALYs: the age-weights on balance. *Bull*  
8 *World Health Organ* 1996;74(4):439.  
9  
10 16. Murray CJL, Acharya AK. Understanding DALYs. *J Health Econ* 1997;16(6):703-30.  
11  
12 17. Anand S, Hanson K. Disability-adjusted life years: a critical review. *J Health Econ*  
13 1997;16(6):685-702.  
14  
15  
16  
17  
18  
19  
20  
21  
22  
23  
24  
25  
26  
27  
28  
29  
30  
31  
32  
33  
34  
35  
36  
37  
38  
39  
40  
41  
42  
43  
44  
45  
46  
47  
48  
49  
50  
51  
52  
53  
54  
55  
56  
57  
58  
59  
60

For peer review only



1  
2  
3 **Figure titles and legends**  
4

5  
6 **Figure 1:** Age distribution of disease mortality in Australia (Dashed line: life expectancy for  
7  
8 Australia)  
9

10  
11 **Figure 2:** Burden of disease in three countries using four different methods of estimation.  
12

13  
14 **Figure 3:** Burden of disease estimates as a proportion of the total burden of disease in Australia  
15

16  
17 **Figure 4:** Burden of disease estimates as a proportion of the total burden of disease in USA  
18

19  
20 **Figure 5:** Burden of disease estimates as a proportion of the total burden of disease in South  
21  
22 Africa.  
23  
24  
25  
26  
27  
28  
29  
30  
31  
32  
33  
34  
35  
36  
37  
38  
39  
40  
41  
42  
43  
44  
45  
46  
47  
48  
49  
50  
51  
52  
53  
54  
55  
56  
57  
58  
59  
60

1  
2  
3 **Supplementary files:**  
4

5  
6 Supplementary file 1: Age distribution of disease mortality in South Africa.  
7

8  
9 Supplementary file 2: Age distribution of disease mortality in USA.  
10

11  
12 Supplementary file 3: Unstandardized burden of disease estimates (in '000 years) for Australia  
13

14  
15 Supplementary file 4 Unstandardized burden of disease estimates (in '000 years) for USA using  
16  
17 4 methods  
18

19  
20 Supplementary file 5: Unstandardized burden of disease estimates (in '000 years) for South  
21  
22 Africa using 4 methods  
23  
24  
25  
26  
27  
28  
29  
30  
31  
32  
33  
34  
35  
36  
37  
38  
39  
40  
41  
42  
43  
44  
45  
46  
47  
48  
49  
50  
51  
52  
53  
54  
55  
56  
57  
58  
59  
60

1  
2  
3  
4  
5  
6  
7  
8  
9  
10  
11  
12  
13  
14  
15  
16  
17  
18  
19  
20  
21  
22  
23  
24  
25  
26  
27  
28  
29  
30  
31  
32  
33  
34  
35  
36  
37  
38  
39  
40  
41  
42  
43  
44  
45  
46  
47  
48  
49  
50  
51  
52  
53  
54  
55  
56  
57  
58  
59  
60

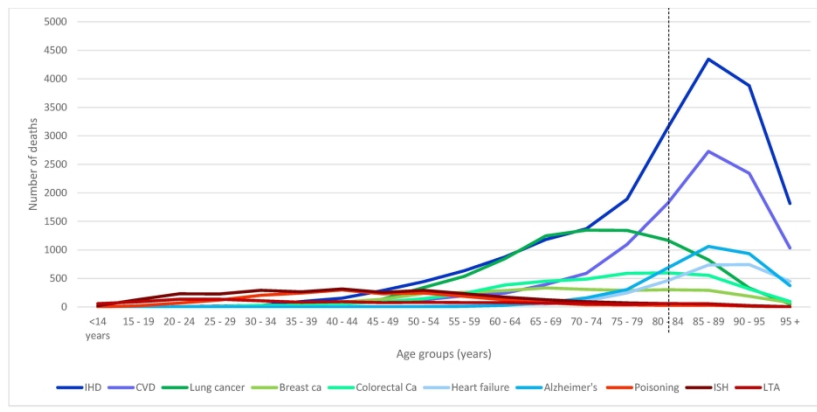

Age distribution of disease mortality in Australia (Dashed line: life expectancy for Australia)

279x215mm (300 x 300 DPI)

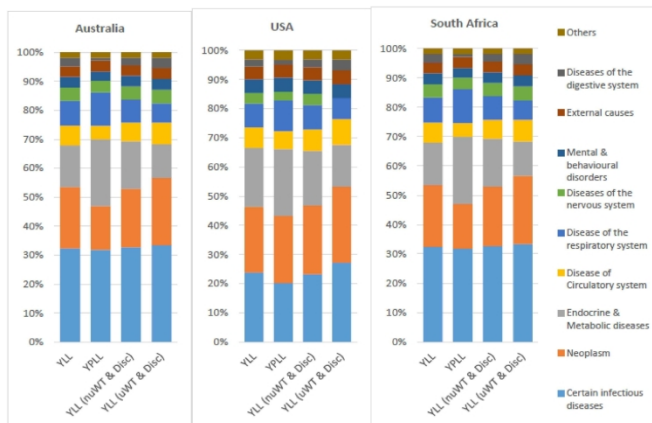

Burden of disease in three countries using four different methods of estimation.

279x215mm (300 x 300 DPI)

1  
2  
3  
4  
5  
6  
7  
8  
9  
10  
11  
12  
13  
14  
15  
16  
17  
18  
19  
20  
21  
22  
23  
24  
25  
26  
27  
28  
29  
30  
31  
32  
33  
34  
35  
36  
37  
38  
39  
40  
41  
42  
43  
44  
45  
46  
47  
48  
49  
50  
51  
52  
53  
54  
55  
56  
57  
58  
59  
60

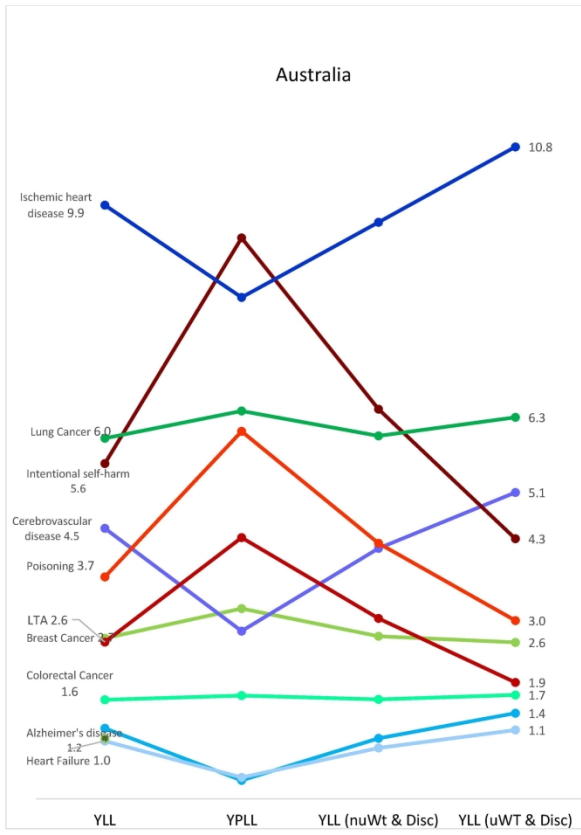

Burden of disease estimates as a proportion of the total burden of disease in Australia  
 215x279mm (300 x 300 DPI)

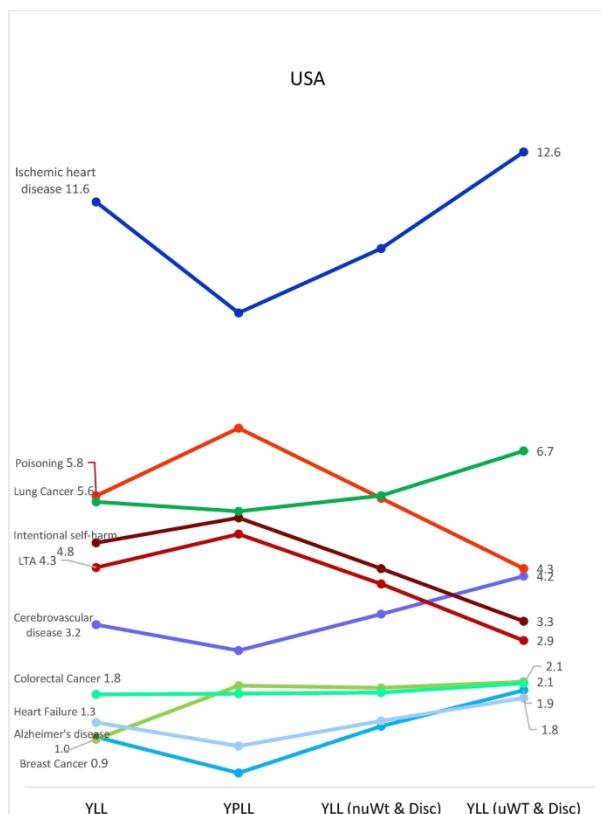

Burden of disease estimates as a proportion of the total burden of disease in USA

215x279mm (300 x 300 DPI)

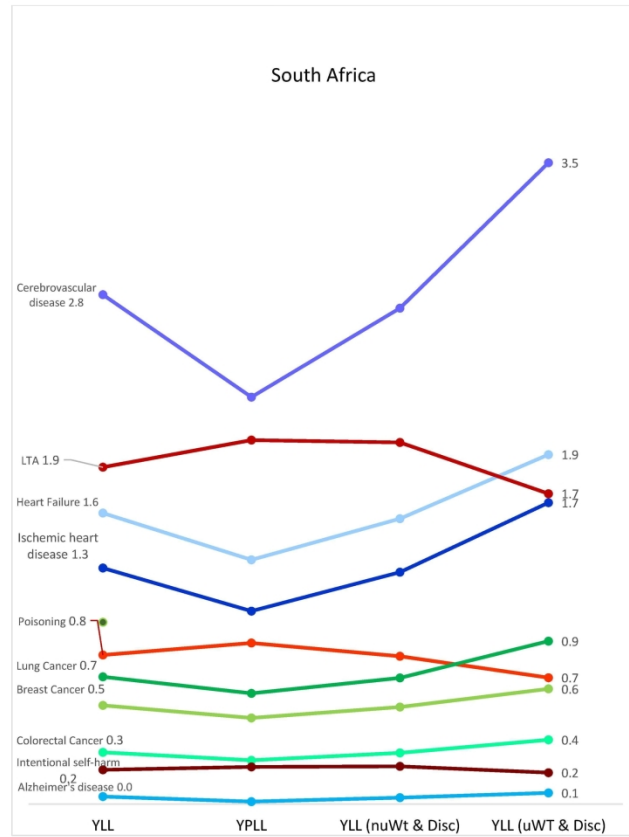

Burden of disease estimates as a proportion of the total burden of disease in South Africa.

215x279mm (300 x 300 DPI)

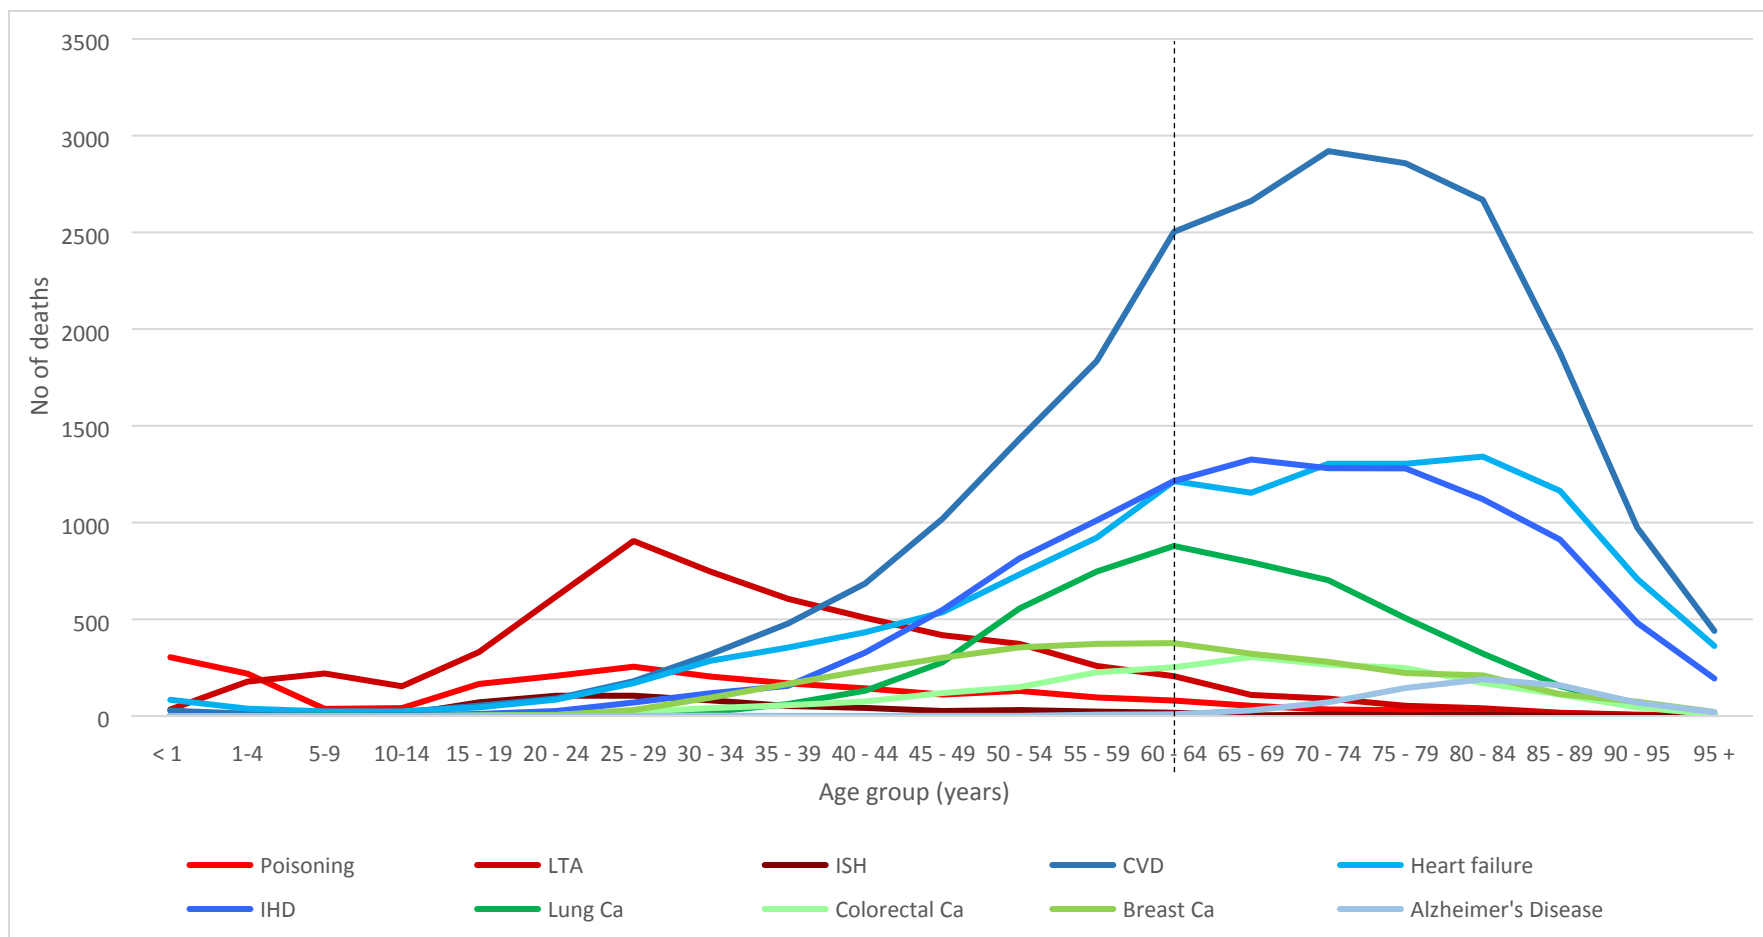

Supplementary fig 1: Age distribution of disease mortality in South Africa. (Dashed line: Life expectancy)



1  
2  
3  
4  
5  
6  
7  
8  
9  
10  
11  
12  
13  
14  
15  
16  
17  
18  
19  
20  
21  
22  
23  
24  
25  
26  
27  
28  
29  
30  
31  
32  
33  
34  
35  
36  
37  
38  
39  
40  
41  
42  
43  
44  
45  
46  
47

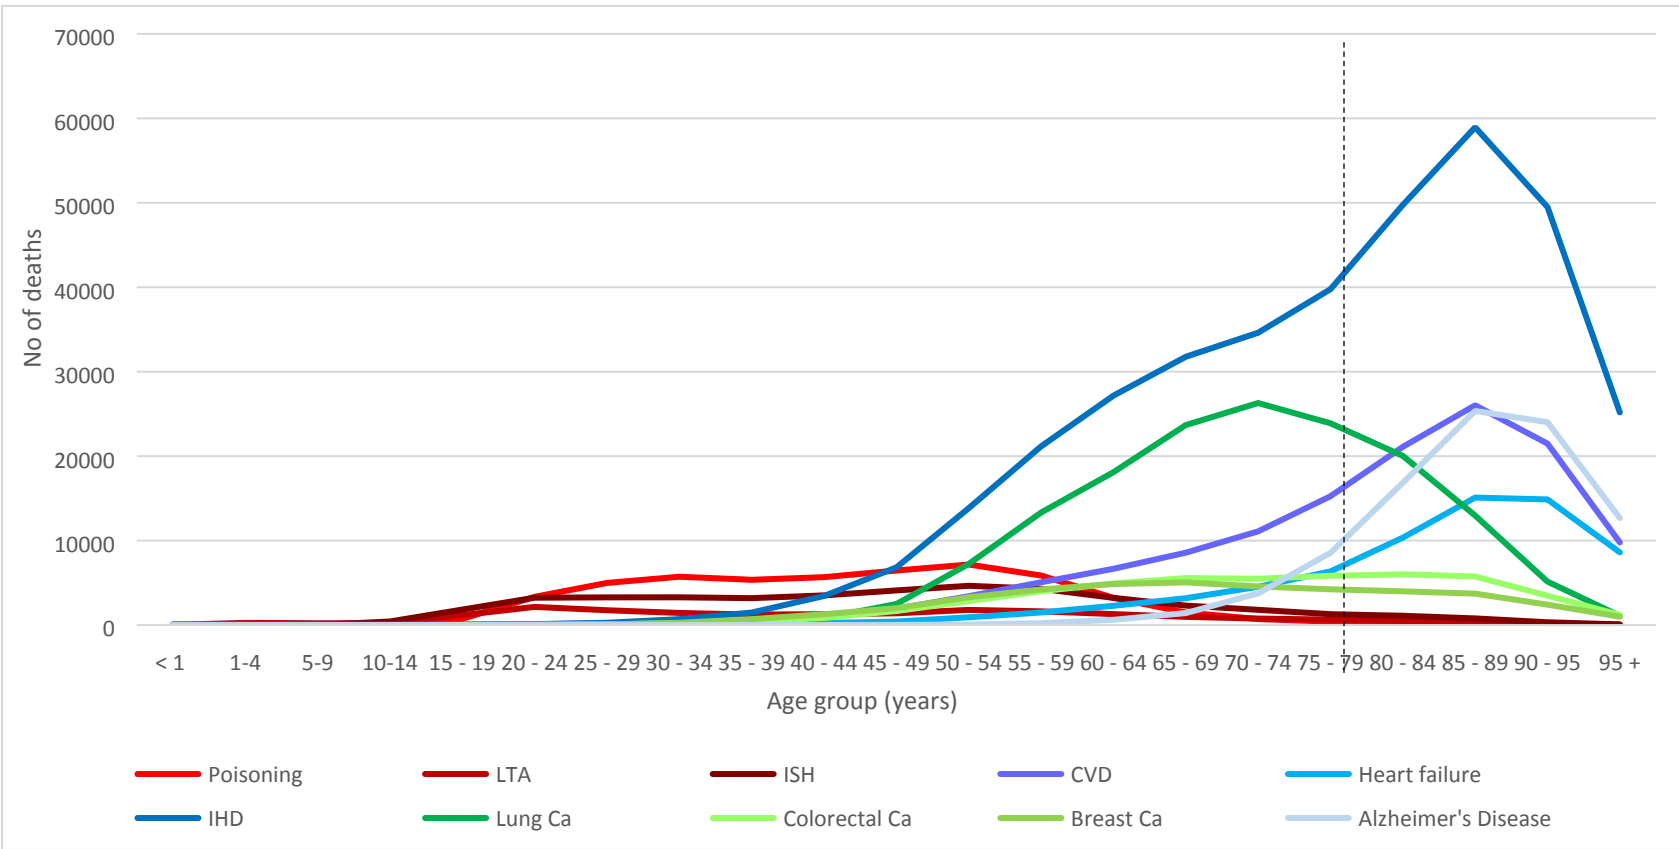

Supplementary fig 2: Age distribution of disease mortality in USA. (Dashed line: Life expectancy)

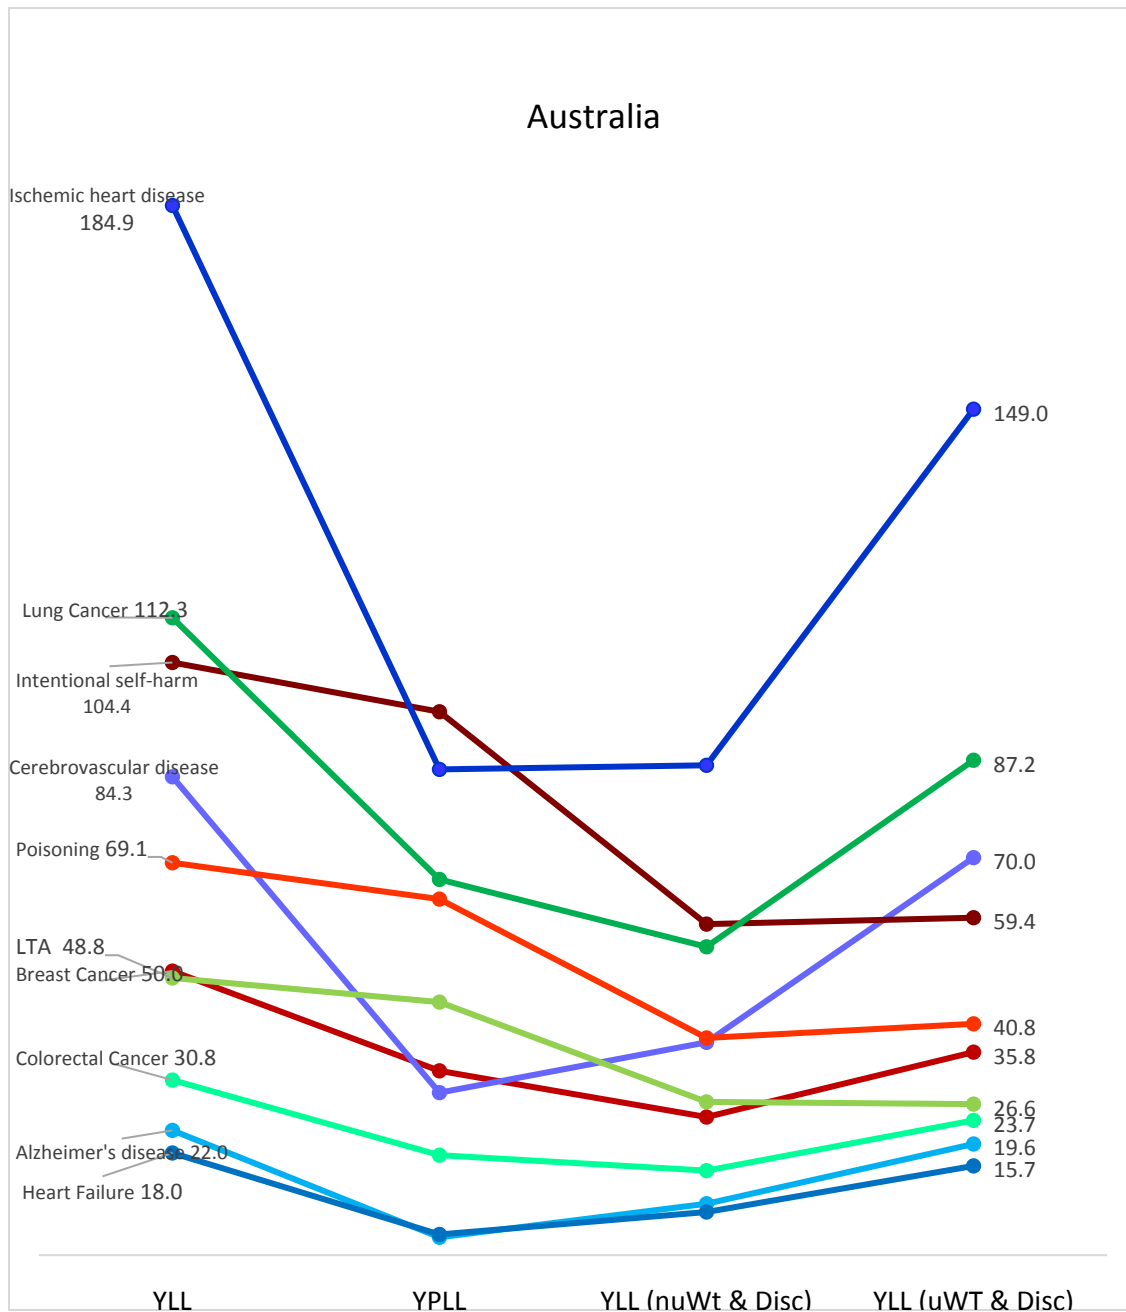

Supplementary fig 3: Unstandardized burden of disease estimates (in '000 years) for Australia using 4 methods: a: Unweighted and undiscounted YLL; b. Years of potential life lost (YPLL); c. YLL with non-uniform age weighting with discount (nuWT & Disc); d. YLL with uniform age weighting with discounting (uWT & Disc)

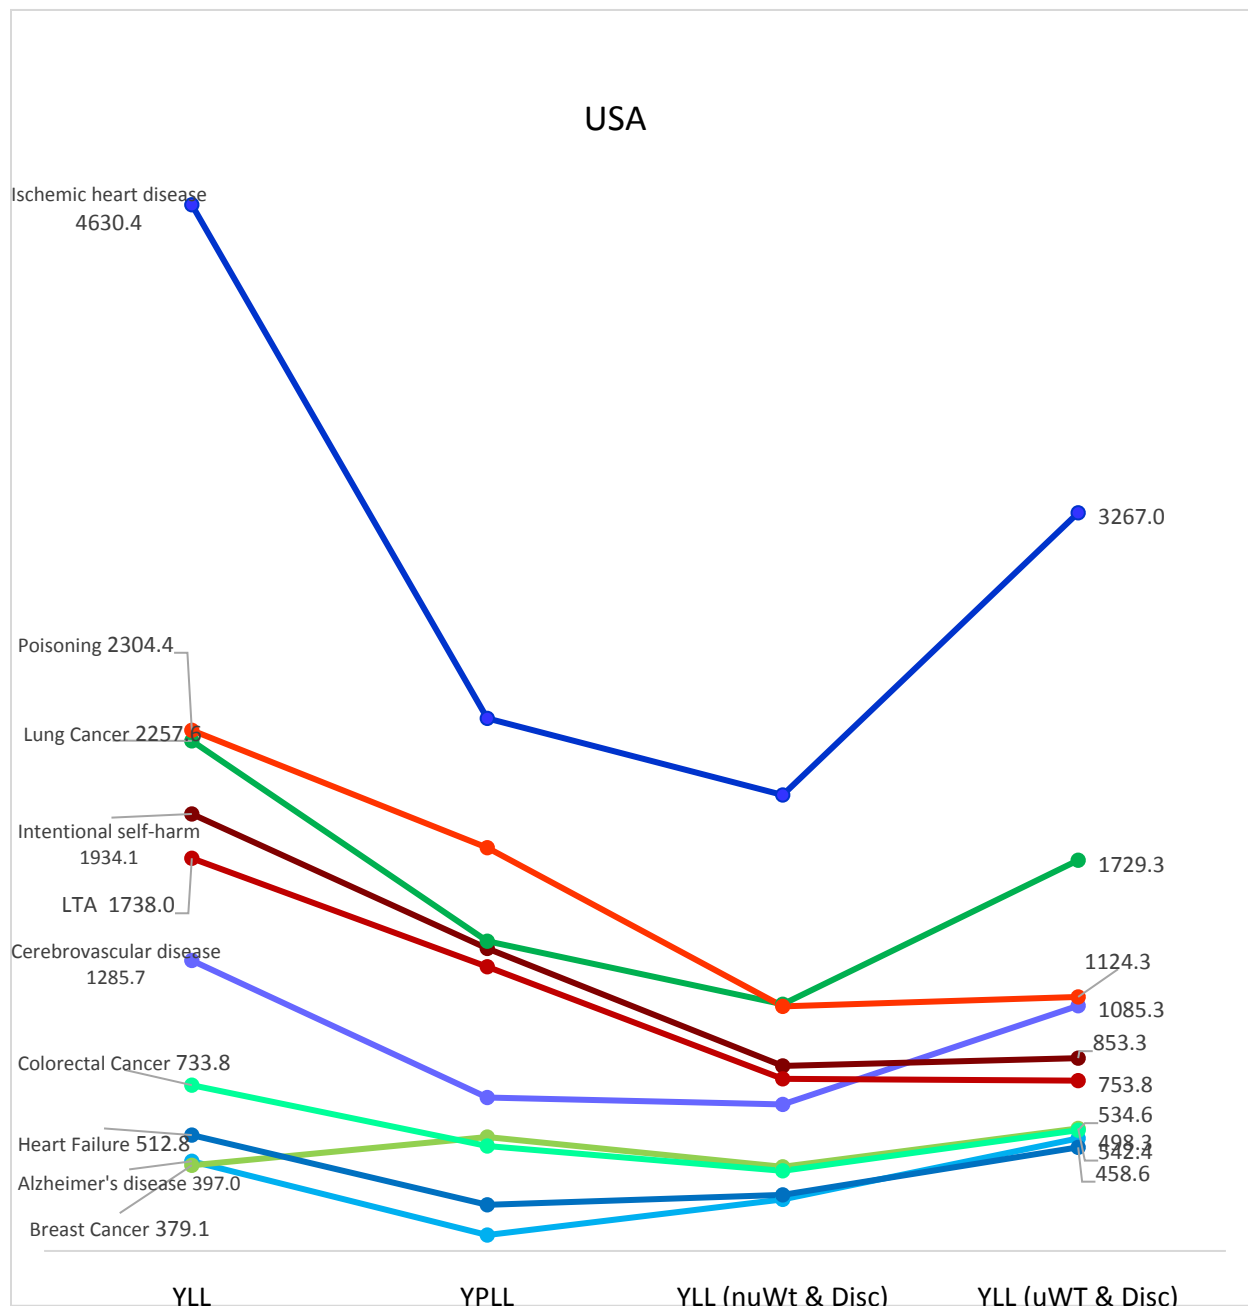

Supplementary fig 4: Unstandardized burden of disease estimates (in '000 years) for South Africa using 4 methods: a: Unweighted and undiscounted YLL; b. Years of potential life lost (YPLL); c. YLL with non-uniform age weighting with discount (nuWT & Disc); d. YLL with uniform age weighting with discounting (uWT & Disc)

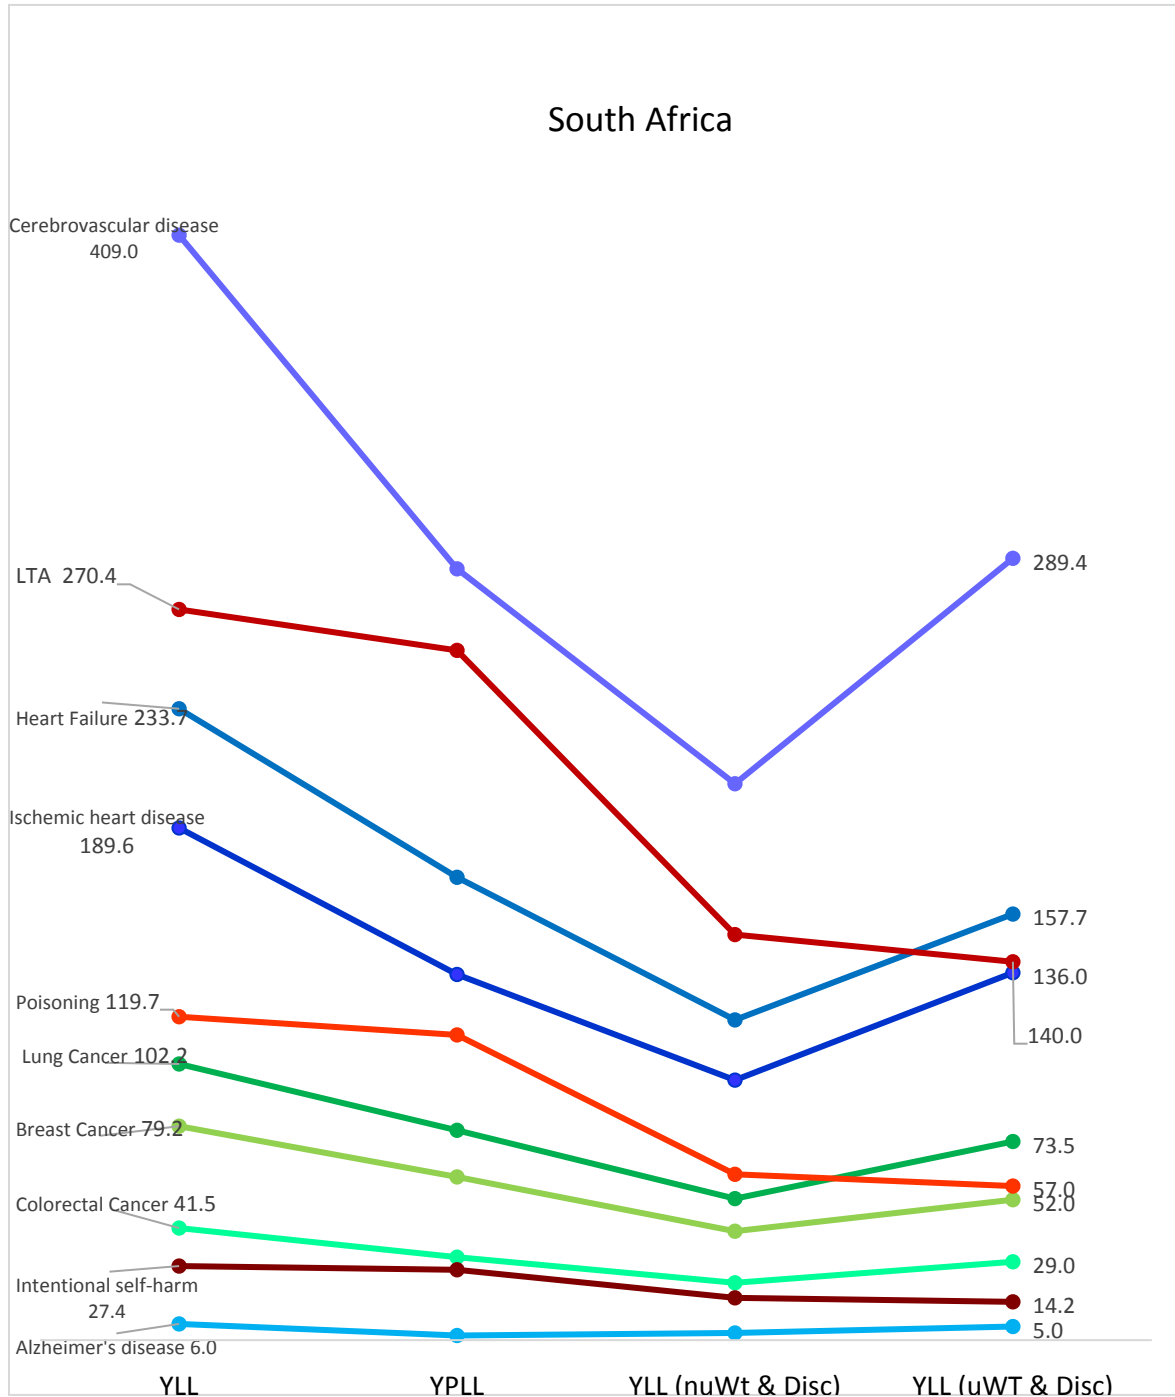

Supplementary fig 5: Unstandardized burden of disease estimates (in '000 years) for USA using 4 methods: a: Unweighted and undiscounted YLL; b. Years of potential life lost (YPLL); c. YLL with non-uniform age weighting with discount (nuWT & Disc); d. YLL with uniform age weighting with discounting (uWT & Disc)

# BMJ Open

## Years of life lost or years of potential life lost: Implications for the estimation of the burden of disease

|                                 |                                                                                                                                                                                              |
|---------------------------------|----------------------------------------------------------------------------------------------------------------------------------------------------------------------------------------------|
| Journal:                        | <i>BMJ Open</i>                                                                                                                                                                              |
| Manuscript ID                   | bmjopen-2018-027825.R1                                                                                                                                                                       |
| Article Type:                   | Research                                                                                                                                                                                     |
| Date Submitted by the Author:   | 31-Mar-2019                                                                                                                                                                                  |
| Complete List of Authors:       | Egunsola, Oluwaseun; University of Sydney,<br>Raubenheimer, Jacques; University of Sydney, Discipline of Pharmacology<br>Buckley, Nicholas; University of Sydney, Discipline of Pharmacology |
| <b>Primary Subject Heading</b>: | Epidemiology                                                                                                                                                                                 |
| Secondary Subject Heading:      | Epidemiology, Global health, Research methods                                                                                                                                                |
| Keywords:                       | EPIDEMIOLGY, PUBLIC HEALTH, Health economics < HEALTH SERVICES ADMINISTRATION & MANAGEMENT                                                                                                   |
|                                 |                                                                                                                                                                                              |

SCHOLARONE™  
Manuscripts

1  
2  
3  
4  
5 **Years of life lost or years of potential life lost: Implications for the**  
6 **estimation of the burden of disease**  
7  
8  
9

10  
11  
12 Oluwaseun Egunsola, Jacques Raubenheimer, Nicholas Buckley  
13

14  
15  
16  
17 Clinical Pharmacology and Toxicology Research Group, Discipline of Pharmacology, The  
18 University of Sydney, NSW, Australia.  
19  
20  
21  
22  
23  
24  
25  
26  
27  
28  
29  
30  
31  
32

33 **Corresponding author** – Oluwaseun Egunsola: Clinical Pharmacology and Toxicology  
34 Research Group, Discipline of Pharmacology, Level 3, 1-3 Ross Street, School of Medical  
35 Sciences, Sydney Medical School, The University of Sydney, NSW, Australia, 2006  
36  
37  
38

39 **E-mail address** – oluwaseun.egunsola@sydney.edu.au  
40

41 **Telephone no** - +61 (0) 286276626  
42  
43  
44  
45

46 **Word count:** 2226  
47  
48  
49  
50  
51  
52  
53  
54  
55  
56  
57  
58  
59  
60

## ABSTRACT

**Objectives:** The years of life lost (YLL) and the years of potential life lost (YPLL) measures were developed in order to quantify the burden of premature deaths on the society. This study examines the impact of the type of method used on the estimation of the burden of diseases.

**Design:** Four metrics of burden of disease estimation namely; YPLL, non-age weighted YLL without discounting, and YLL with uniform or non-uniform age weighting and discounting were used to calculate the burden of selected diseases in three countries: Australia, USA and South Africa. Mortality data were obtained from the World Health Organization (WHO) database. For each metric, the burden of disease was standardised as a percentage of the total national burden of disease. The total burden of disease for each country was determined by calculating the sum of the YLL for all ICD 10 disease categories recorded on the WHO mortality database.

**Results:** There were variations in the burden of disease estimates with the four methods. The standardised YPLL estimates were higher than other methods of calculation for diseases common among young adults and lower for diseases common among the elderly. In the three countries, discounting decreased the contributions of diseases common among younger adults to the total burden of disease; while the contributions of diseases of the elderly increased. After discounting with age weighting, there were no distinct patterns for diseases of the elderly and young adults in the three countries.

**Conclusions:** Given the variability in the estimates of the burden of disease with different approaches, there should be transparency regarding the type of metric used and a generally acceptable method that incorporates all the relevant social values should be developed.

## STRENGTHS AND LIMITATIONS OF THIS STUDY

1. This study highlights how the choice of burden of disease estimates affect the relative importance of selected diseases in three countries.
2. We have examined the diseases based on the ICD-10 broad categorisation; therefore our estimations have not examined the diseases at a granular level.
3. In the absence of an objective disease selection process, we have selected the diseases based on three crude age categories.

For peer review only



## INTRODUCTION

The metric for estimating the health status of a population has traditionally been the mortality rate. However, in order to identify and prioritise the causes of premature death, as well as quantify the burden of such deaths on the society, the years of life lost (YLL) and the years of potential life lost (YPLL) measures were developed. Both metrics estimate the average number of years a person would have lived had they not died prematurely. Governments and institutions use these metrics to prioritise health funding and research. The years of life lost concept has been in existence since the 1940s.[1] However, it did not gain traction as a planning tool for health promotion and disease prevention until the 1970s and 1980s.[2] The use of YPLL as a measure of premature mortality was introduced by the US Centres for Disease Control (CDC) in 1982, when they started reporting potential years of life lost before the age of 65.[3] YLL as a component of the Disability-Adjusted Life Year was introduced by the global burden of disease (GBD) study published in 1996.[4]

Although the two measures are somewhat similar with respect to what they measure, they differ in the calculations used. For YLL, the number of deaths at a particular age is multiplied by the standard life expectancy at the age at which death occurs. The results for the respective ages or age bands are then summed.[5] YPLL is calculated as deaths of persons up to a cut-off age threshold with the assumption that deaths occurring before this time are untimely .[6] However, the choice of maximum cut-off age is arbitrary, and has differed between authors, with a profound impact on the resultant estimates.

Deaths beyond the cut-off age, usually the life expectancy in a specific population, are not measurable with YPLL. Social values such as time-based discounting and age weighting can be incorporated into YPLL and YLL calculations. Discount rates estimates the net present

1  
2  
3 value of years of life lost. Some studies, for example, have utilised a discount rate of 3% time  
4 of life lost in the future. Which implies that a year of healthy life gained next year is worth 3%  
5 less than healthy life lived now.[5] Discount rates of up to 5% have been used in cost  
6 effectiveness analyses.[7] Age weighting implies that the value of life depends on age, such  
7 that greater weights are assigned to deaths at younger ages and lower weights to deaths at older  
8 ages.[8] Although the World Health Organization (WHO) have adopted the no-discount and  
9 no-age weighting methods,[8] age weighting and time-based discounting are still commonly  
10 used by researchers. [9–11]

11  
12 It is important that proportionate amounts of resources are allocated to disease research and  
13 prevention. How the burden of one disease is perceived relative to others depend on the metric  
14 used and whether adjustments were made to those metrics. In this report, we examine the  
15 impact of the choice of index (YLL or YPLL), age weighting, and discounting on the estimation  
16 of the burden of diseases.

## 17 **METHODS**

18  
19 The 2014 mortality data for three countries, Australia, USA and South Africa, were obtained  
20 from the WHO database. The WHO mortality database contains mortality data by country,  
21 year, age, sex and cause of death, submitted to the WHO by its member states on an annual  
22 basis since 1950. The causes of death on the database are coded according to the International  
23 statistical Classification of Diseases and health related problems 10th revision (ICD-10).[12]  
24 Ten diseases, grouped into three categories were selected. The first group consists of ischemic  
25 heart disease, cerebrovascular disease, Alzheimer's disease and heart failure. These were  
26 diseases with peak mortality after life expectancy. The second group were diseases with peak  
27 mortality in younger adults. These include: poisoning, land transport accidents (LTA) and  
28 intentional self-harm. A third group consisted of diseases including lung cancer, colorectal  
29  
30  
31  
32  
33  
34  
35  
36  
37  
38  
39  
40  
41  
42  
43  
44  
45  
46  
47  
48  
49  
50  
51  
52  
53  
54  
55  
56  
57  
58  
59  
60

1  
2  
3 cancer and breast cancer, with peak mortality after age 50 but before age of life expectancy at  
4 birth (Figure 1 and see Supplementary files 1 and 2). The number of deaths in five-year age  
5 intervals (except for infants and elderly over 85 years old: 0,1–4, 5–9, 10–14, ... 80–84, 85+)  
6 were extracted onto a Microsoft Excel worksheet and the standard life expectancies for the  
7 average ages of deaths (the mean of the lower and upper bound of each age group), for both  
8 males and females were obtained from the WHO standard life tables.[13] YLL was calculated,  
9 using Microsoft Excel, from the sum of the number of deaths due to a disease multiplied by  
10 life expectancy for that age band.  
11  
12  
13  
14  
15  
16  
17  
18  
19  
20  
21

$$YLL = N * L$$

22  
23  
24  
25 Where:

26  
27  
28 N = Number of deaths at a particular age or age band and L is the standard life expectancy for  
29 the age or age band of death.  
30  
31

32  
33 Four metrics were compared:

- 34  
35 • Years of potential life lost: YPLL,
- 36  
37 • YLL without age weighting (uniform weighting) or discounting: YLL [0, 0]
- 38  
39 • YLL with non-uniform age weighting and discounting: YLL [1, 0.03]
- 40  
41 • YLL with uniform age weighting and discounting: YLL [0, 0.03]
- 42  
43  
44  
45  
46  
47

48  
49 Details of the method for calculating non-uniform age weighted (K=1) and non-zero  
50 discounted; as well as 3% discounted and uniform age weighted (K=0) YLL are available in  
51 the WHO practical guide for national burden of disease studies.[14]  
52  
53  
54

55  
56 From this guide, we used formula 11.2.:

57  
58  $YLL = N/0.03(1 - e^{-0.03L})$  for 3% discounting and uniform age weights  
59  
60

And for non-zero discounting and age weighting we used formula 11.3:

$$YLL = N C e^{(ra)} / (\beta+r)^2 [e^{-(\beta+r)(L+a)} [-(\beta+r) (L+a)-1] - e^{-(\beta+r)a} [-(\beta+r)a-1]]$$

where N is number of deaths, r is the discount rate of 0.03, C is the age-weighting correction constant of 0.1658,  $\beta$  is the parameter from the age-weighting function value 0.04, a is the age of onset, and L is the duration of disability or time lost due to premature mortality. L was derived from the 2014 WHO life tables for each of the three countries.[13]

To enable comparison, YPLL were calculated by multiplying the number of disease-specific deaths for a given age group by the expected life expectancy for each age group up to a cut off age of 79 years[15] by using the formula:  $YPLL = \sum_x D_x(79-A_x)$

Where  $D_x$  = registered number of deaths at age due to a particular cause of death and  $A_x$  = adjusted age at death.

For each method, the burden of disease was standardised as a percentage of the total national burden of disease, i.e.

$$\text{Standardised burden of disease} = (\text{Burden of disease} / \text{total burden of diseases}) 100$$

The years of life lost for each disease was expressed as the percentage of the total YLL lost in the population due to premature mortality. The total YLL for each country was determined by calculating the sum of the YLL for all ICD 10 disease categories on the WHO mortality database.

**Patients and Public Involvement:** Patients and public were not involved in this study.

## RESULTS

There were variations in the contributions of each disease class to the total national burden of disease in the selected countries, with the four methods of estimation. In all three countries, burden of disease estimation with YPLL yielded the highest estimates for diseases common among younger adults, resulting in a higher contribution of these diseases to the total burden of disease in the respective countries (Figures 2–4). In Australia, the standardised burden of intentional self-harm was 9.3% with YPLL, compared to 5.1%, 6.0% and 3.9% with YLL (0, 0), YLL (1, 0.03) and YLL (0, 0.03) respectively. In the USA, the standardised burden of intentional self-harm was 5.3% with YPLL, compared to 4.4%, 4.0% and 2.8% with YLL [0, 0], YLL [1, 0.03] and YLL [0, 0.03] respectively. For intentional self-harm in South Africa, YPLL did not differ from other metrics (0.2% respectively) (Figure 4). Conversely, YPLL resulted in the lowest estimate of disease burden for diseases common among the elderly. In the USA, the standardised burden of ischemic heart disease was 9.4% compared to 12.1%, 11.0%, and 12.4%, with YLL(0, 0), YLL (1, 0.03) and YLL (0, 0.03), respectively (Figure 3). In the three countries, discounting decreased the contributions of diseases common among younger adults to the total burden of disease; while the contributions of diseases of the elderly increased (Figures 2–4). In Australia, the standardised burden of ischemic heart disease, heart failure and Alzheimer’s disease increased from 10.9% to 12%, 1.2% to 1.4% and 1.4% to 1.7% respectively after discounting without age weighting; while the standardised burden of intentional self-harm, poisoning and land transport accidents decreased from 5.1% to 3.9%, 3.4% to 2.7% and 2.4% to 1.7%, respectively after discounting without age weighting (Figure 2). A similar pattern was seen with estimates from USA and South Africa (Figures 3 & 4). In the USA, the standardised burden of intentional self-harm, poisoning and land transport accidents decreased from 4.4% to 2.8%, 5.2% to 3.6% and 4.0% to 2.4%; while ischemic heart disease, heart failure and Alzheimer’s disease increased from 12.1% to 12.4%, 1.4% to 1.9%

1  
2  
3 and 1.2% to 2.2% respectively. In South Africa, Ischemic heart disease, heart failure and  
4  
5 Alzheimer's disease increased from 1.3% to 1.6%, 1.6% to 1.9% and 0.05 to 0.07%  
6  
7 respectively after discounting without age weighting; while minimal decreases were seen with  
8  
9 poisoning and land transport accidents 0.8% to 0.7% and 1.8% to 1.7% respectively. There was  
10  
11 no difference between discounted and undiscounted YLL estimates for intentional self-harm  
12  
13 (0.2%). After discounting with age weighting, there were no distinct patterns for diseases of  
14  
15 the old and young in the three countries (Figures 2-4).  
16  
17  
18  
19  
20  
21  
22  
23  
24  
25  
26  
27  
28  
29  
30  
31  
32  
33  
34  
35  
36  
37  
38  
39  
40  
41  
42  
43  
44  
45  
46  
47  
48  
49  
50  
51  
52  
53  
54  
55  
56  
57  
58  
59  
60

## DISCUSSION

We have shown that estimates of the relative burden of diseases are highly dependent on the methods of calculation used. This is especially so for countries with long life expectancy, and for diseases that preferentially affected the young or elderly. The standardised YPLL estimates were relatively higher for diseases common among younger adults, but smaller in absolute terms in the two countries (USA and Australia) with higher life expectancies; conversely, the standardised YPLL estimates were lower for diseases of the elderly. On account of the reduction in the contribution of deaths in older age groups with YPLL estimates, the relative contribution of the causes in younger adults increased. Similarly, discounting without age weighting increased the contribution of diseases of the elderly to the total burden of disease; while the contributions of diseases of younger adults decreased.

The variations in estimates of the burden of disease can change the relative 'importance' of a disease; such that advocates and researchers interested in promoting research on particular diseases could choose an approach that best supports their cause. In our study, intentional self-harm was the most 'burdensome' of all the 10 diseases in Australia using YPLL estimates, ahead of ischemic heart disease, lung cancer and cerebrovascular disease. However, with the uniform weighted YLL with discount method, intentional self-harm decreased in relevance to the fourth most 'burdensome' disease. On account of this variability, transparency in the selection of appropriate methods is important given that these estimates may be important for the prioritisation of diseases for research funding. Gillum et al.[16] showed a positive correlation between burden of disease (measured using various indicators, including YLL) and the amount of research funding received from the US National Institutes of Health in 2006; although the degree of correlation was less than in 1996.[16]

1  
2  
3 The WHO recommends that individual countries should report on their national burden of  
4 disease and they have provided resources on their website for these calculations.[17] The  
5 resources provided are for YLL, which indicates a tacit preference for this method. Some  
6  
7  
8 resources provided are for YLL, which indicates a tacit preference for this method. Some  
9  
10 national agencies, including the Australian Bureau of Statistics and the US CDC, however,  
11  
12 estimate the YPLL. Prior to the 2010 Global Burden of Disease (GBD) study, time-based  
13  
14 discounting with or without age weighting were utilised [18]. In the 1990[4] and 2004[19]  
15  
16 GBD studies, 3% discounting with age weighting was used; while in the 2001 study,[20] 3%  
17  
18 discounting without age weighting was used. Several national burden-of-disease studies have  
19  
20 continued to include time discounting with or without age weighting;[9–11] while some other  
21  
22 studies have utilised neither.[21] Melse et al., in evaluating the burden of disease in the  
23  
24 Netherlands, justified their non-utilisation of age weighting and time-based discounting as a  
25  
26 practical way of maintaining transparency of figures.[21] Barendregts et al.[22] reported that  
27  
28 the addition of age weights to discounted estimates, resulted in ages 0–27 years becoming more  
29  
30 important than 9–54 years. Sensitivity analyses have been recommended to determine the  
31  
32 implications of including or excluding time-based discounting and age weighting in the burden  
33  
34 of disease estimates.[5] Although unweighted YLL without discount generally produced higher  
35  
36 burden estimates than the three other methods for all 10 diseases (see Supplementary files 3-  
37  
38 5), we have shown in this study that the adjusted values with this method were closer to age-  
39  
40 weighted YLL with discount. Both methods yielded results that were consistently between the  
41  
42 two extremes of YPLL and uniform weighted YLL with discount (Figures 2–4).  
43  
44  
45  
46  
47  
48  
49

50 Furthermore, the propriety of age weighting and discounting is a controversial subject and  
51  
52 different authors have argued for or against them. Notably, Murray and Acharya opined that  
53  
54 age weighting should not be a social construct that is based on our relative desire to take care  
55  
56 of children and the elderly, but rather a system premised on how productive an age group is  
57  
58 and the need to prioritise their wellbeing.[23] Anand and Hanson argued that all lives are equal  
59  
60



1  
2  
3 in importance and disagreed that people's lives should be valued in terms of their productivity.  
4  
5 They also suggested that discounting and weighting reduces the YLL in females relative to  
6  
7 males.[24]  
8  
9

10 Age weighting attaches different values to life years lived at different ages. Lower weights are  
11  
12 usually given to years of healthy life at very young and old ages than for other ages. Time-  
13  
14 based discounting is useful in health economics research; it is included in YLL calculation to  
15  
16 reflect the preference on life years closer to the present. However, there are sociocultural factors  
17  
18 worthy of consideration. For example, the value of a year of life gained now compared to one  
19  
20 gained in 10 years will depend on societal perceptions of life. Also, when an economic value  
21  
22 is attached to a year of life lost, the total values can differ significantly depending on which  
23  
24 method is used to calculate the number of years lost.  
25  
26  
27  
28  
29

30 Using YPLL to rank prematurity-related mortality also has its drawbacks. It does not account  
31  
32 for deaths beyond the life expectancy at birth for the country or beyond an arbitrarily selected  
33  
34 cut-off age, essentially assigning no burden to death at older ages. Therefore, reporting YPLL  
35  
36 often requires a reference to the age threshold against which the YPLL was calculated. YPLL  
37  
38 therefore generally underestimates the years lost to disease common in old age. The gulf  
39  
40 between YPLL and YLL estimates can be accentuated in countries with aging populations and  
41  
42 ranking can also be tilted in favour of diseases that are common early in life.  
43  
44  
45

46 This study has several limitations. We have examined the diseases based on the ICD-10 broad  
47  
48 categorisation. Therefore our estimations have not examined the diseases at a granular level.  
49  
50 Comparing the burden of disease estimation for the individual diseases is complex in the  
51  
52 absence of an objective selection process, however we have used three crude age categories to  
53  
54 select the diseases.  
55  
56  
57  
58  
59  
60

1  
2  
3 In conclusion, the choice of appropriate metrics of disease burden is important for the  
4 prioritisation of research funding. Given the variability in the estimates of the burden of disease  
5 with different approaches, there should be transparency regarding the type of metric used and  
6 a generally acceptable method that incorporates all the relevant social values should be  
7 developed.  
8  
9  
10  
11  
12  
13  
14  
15  
16  
17  
18  
19  
20  
21  
22  
23  
24  
25  
26  
27  
28  
29  
30  
31  
32  
33  
34  
35  
36  
37  
38  
39  
40  
41  
42  
43  
44  
45  
46  
47  
48  
49  
50  
51  
52  
53  
54  
55  
56  
57  
58  
59  
60

For peer review only

1  
2  
3  
4  
5  
6 **Competing interests:** The authors declare that they have no competing interests  
7  
8

9 **Funding statement:** This work was supported by the National Health and Medical Research  
10 Council (NHMRC) through the Translational Australian Clinical Toxicology Program (TACT)  
11 (grant ID1055176).  
12  
13  
14

15  
16 **Authors' contributions:** OE and NB conceptualised and designed the study. OE and JR  
17 analysed the data. OE wrote the initial draft of the manuscript. JR and NB critically reviewed  
18 the manuscript. All authors read and approved the final manuscript.  
19  
20  
21  
22

23  
24 **Data sharing statement:** Reusable data for calculated burden of disease estimates are  
25 available anytime upon request from Dr Oluwaseun Egunsola. Orcid ID: 0000-0002-0500-  
26 9501.  
27  
28  
29  
30  
31  
32  
33  
34  
35  
36  
37  
38  
39  
40  
41  
42  
43  
44  
45  
46  
47  
48  
49  
50  
51  
52  
53  
54  
55  
56  
57  
58  
59  
60

**REFERENCES**

- 1 Haenszel W. A standardized rate for mortality defined in units of lost years of life. *Am J Public Health* 1950;**40**:17–26.
- 2 Perloff J, LeBailly S, Kletke P, *et al*. Premature death in the United States: years of life lost and health priorities. *J Public Heal Policy* 1984;**5**:167–84.
- 3 Centre for Disease Control. Premature deaths, monthly mortality, and monthly physician contacts--United States. MMWR Morbidity and mortality weekly report 1982. 1982. <https://www.cdc.gov/mmwr/preview/mmwrhtml/lmrk019.htm>
- 4 Murray, CJ Lopez A. A comprehensive assessment of mortality and disability from disease, injuries and risk factors in 1990 and projected to 2020. In: *The Global Burden of Disease*. Geneva: : World Health Organization 1996. <http://www.who.int/iris/handle/10665/41864>
- 5 Prüss-Üstün A, Mathers C, Corvalán C, *et al*. Introduction and methods: assessing the environmental burden of disease at national and local levels. 2003. [http://www.who.int/quantifying\\_ehimpacts/publications/en/9241546204.pdf](http://www.who.int/quantifying_ehimpacts/publications/en/9241546204.pdf) (accessed 14 Jun 2018).
- 6 Gardner JW, Sanborn JS. Years of potential life lost (YPLL)—what does it measure? *Epidemiology* 1990;**1**:322–9. doi:10.1097/00001648-199007000-00012
- 7 Sanders GD, Neumann PJ, Basu A, *et al*. Recommendations for conduct, methodological practices, and reporting of cost-effectiveness analyses: Second panel on cost-effectiveness in health and medicine. *JAMA - J Am Med Assoc* 2016;**316**:1093–103. doi:10.1001/jama.2016.12195

- 1  
2  
3 8 WHO Department of Health Statistics and Information Systems. WHO methods and  
4 data sources for global burden of disease estimates 2000-2011. Geneva: 2013.  
5  
6 doi:10.1016/j.jaad.2007.03.004  
7  
8  
9  
10  
11 9 Oliva-Moreno J, Peña-Longobardo L, Alonso S. Loss of labour productivity caused by  
12 disease and health problems: What is the magnitude of its effect on Spain's Economy?  
13 *Eur J Heal Econ* 2012;**27**:631–637. doi:10.1007/s10198-011-0344-9  
14  
15  
16  
17  
18 10 Yoon J, Seo H, Oh IH, *et al.* The non-communicable disease burden in Korea:  
19 Findings from the 2012 Korean burden of disease study. *J Korean Med Sci* Published  
20 Online First: 2016. doi:10.3346/jkms.2016.31.S2.S158  
21  
22  
23  
24  
25  
26 11 Maniecka-Bryła I, Bryła M, Bryła P, *et al.* The burden of premature mortality in  
27 Poland analysed with the use of standard expected years of life lost. *BMC Public Heal*  
28 2015;**15**:101.  
29  
30  
31  
32  
33 12 World Health Organization. Health statistics and information systems: WHO Mortality  
34 database. [http://www.who.int/healthinfo/mortality\\_data/en/](http://www.who.int/healthinfo/mortality_data/en/) (accessed 21 Jul 2017).  
35  
36  
37  
38 13 WHO Department of Health Statistics and Information Systems. Global Health  
39 Observatory data repository.  
40  
41  
42 2016.<http://apps.who.int/gho/data/node.main.LIFECOUNTRY?lang=en> (accessed 24  
43 Mar 2019).  
44  
45  
46  
47  
48 14 Mathers C, Vos T, Lopez A, *et al.* *National burden of disease studies: a practical*  
49 *guide*. 2nd ed. Geneva: : World Health Organization 2001.  
50  
51  
52  
53 15 Australian Bureau of Statistics. Causes of Death, Australia, 2017.  
54 2018.[https://www.abs.gov.au/AUSSTATS/abs@.nsf/Lookup/3303.0Explanatory](https://www.abs.gov.au/AUSSTATS/abs@.nsf/Lookup/3303.0ExplanatoryNotes12017?OpenDocument)  
55 Notes12017?OpenDocument (accessed 24 Mar 2019).  
56  
57  
58  
59  
60

- 1  
2  
3 16 Gillum LA, Gouveia C, Dorsey E, *et al.* NIH disease funding levels and burden of  
4 disease. *PLoS One* 2011;**6**:e16837. doi:10.1371/journal.pone.0016837  
5  
6  
7  
8  
9 17 World Health Organization. Health statistics and information systems: National tools  
10 2017. 2017.[http://www.who.int/healthinfo/global\\_burden\\_disease/tools\\_national/en/](http://www.who.int/healthinfo/global_burden_disease/tools_national/en/)  
11 accessed (accessed 21 Jul 2017).  
12  
13  
14  
15  
16 18 Devleeschauwer B, Havelaar AH, Maertens De Noordhout C, *et al.* Calculating  
17 disability-adjusted life years to quantify burden of disease. *Int J Public Health*  
18 2014;**59**:565–9. doi:10.1007/s00038-014-0552-z  
19  
20  
21  
22  
23  
24 19 World Health Organization, WHO. *The global burden of disease: 2004 update.*  
25 Geneva: : World Health Organization 2008. doi:10.2471/BLT.09.070565  
26  
27  
28  
29 20 Lopez A, Mathers C, Ezzati M, *et al.* *Global Burden of Disease and Risk Factors.* New  
30 York: : Oxford University Press 2006.  
31  
32  
33  
34 21 Melse J, Essink-Bot M-L, Kramers P, *et al.* A national burden of disease calculation:  
35 Dutch disability-adjusted life-years. *Am J Public Heal* 2000;**90**:1241.  
36  
37  
38  
39 22 Barendregt JJ, Bonneux L, Van Der Maas PJ. DALYs: The age-weights on balance.  
40 *Bull World Health Organ* 1996;**74**:439–43.  
41  
42  
43  
44 23 Murray CJL, Acharya AK. Understanding DALYs. *J Health Econ* 1997;**16**:703–30.  
45 doi:10.1016/S0167-6296(97)00004-0  
46  
47  
48  
49 24 Anand S, Hanson K. Disability-adjusted life years: A critical review. *J Health Econ*  
50 1997;**16**:685–702. doi:10.1016/S0167-6296(97)00005-2  
51  
52  
53  
54  
55  
56  
57  
58  
59  
60

1  
2  
3  
4  
5  
6 **Figure titles and legends**  
7

8  
9 **Figure 1:** Age distribution of disease mortality in Australia (Dashed line: life expectancy for  
10 Australia)  
11

12  
13  
14 **Figure 2:** Burden of disease estimates as a proportion of the total burden of disease in Australia  
15

16  
17 **Figure 3:** Burden of disease estimates as a proportion of the total burden of disease in USA  
18

19  
20 **Figure 4:** Burden of disease estimates as a proportion of the total burden of disease in South  
21 Africa.  
22  
23  
24  
25  
26  
27  
28  
29  
30  
31  
32  
33  
34  
35  
36  
37  
38  
39  
40  
41  
42  
43  
44  
45  
46  
47  
48  
49  
50  
51  
52  
53  
54  
55  
56  
57  
58  
59  
60

1  
2  
3  
4  
5  
6 **Supplementary files:**  
7

8  
9 Supplementary file 1: Age distribution of disease mortality in South Africa.  
10

11  
12 Supplementary file 2: Age distribution of disease mortality in USA.  
13

14  
15 Supplementary file 3: Unstandardized burden of disease estimates (in '000 years) for Australia  
16

17  
18 Supplementary file 4 Unstandardized burden of disease estimates (in '000 years) for USA using  
19  
20 4 methods  
21

22  
23 Supplementary file 5: Unstandardized burden of disease estimates (in '000 years) for South  
24  
25 Africa using 4 methods  
26  
27  
28  
29  
30  
31  
32  
33  
34  
35  
36  
37  
38  
39  
40  
41  
42  
43  
44  
45  
46  
47  
48  
49  
50  
51  
52  
53  
54  
55  
56  
57  
58  
59  
60



1  
2  
3  
4  
5  
6  
7  
8  
9  
10  
11  
12  
13  
14  
15  
16  
17  
18  
19  
20  
21  
22  
23  
24  
25  
26  
27  
28  
29  
30  
31  
32  
33  
34  
35  
36  
37  
38  
39  
40  
41  
42  
43  
44  
45  
46  
47  
48  
49  
50  
51  
52  
53  
54  
55  
56  
57  
58  
59  
60

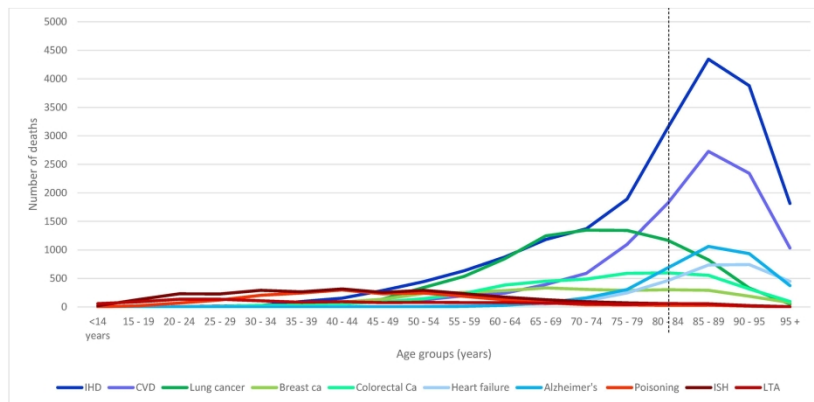

Age distribution of disease mortality in Australia (Dashed line: life expectancy for Australia)

279x215mm (300 x 300 DPI)

1  
2  
3  
4  
5  
6  
7  
8  
9  
10  
11  
12  
13  
14  
15  
16  
17  
18  
19  
20  
21  
22  
23  
24  
25  
26  
27  
28  
29  
30  
31  
32  
33  
34  
35  
36  
37  
38  
39  
40  
41  
42  
43  
44  
45  
46  
47  
48  
49  
50  
51  
52  
53  
54  
55  
56  
57  
58  
59  
60

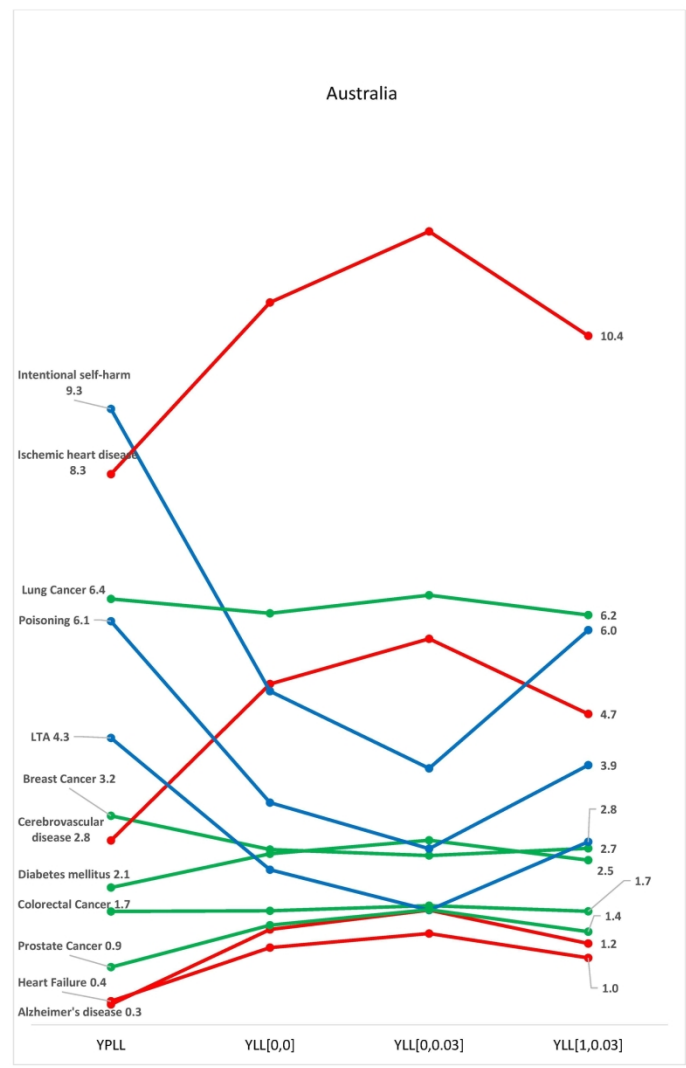

Burden of disease estimates as a proportion of the total burden of disease in Australia  
209x297mm (300 x 300 DPI)

1  
2  
3  
4  
5  
6  
7  
8  
9  
10  
11  
12  
13  
14  
15  
16  
17  
18  
19  
20  
21  
22  
23  
24  
25  
26  
27  
28  
29  
30  
31  
32  
33  
34  
35  
36  
37  
38  
39  
40  
41  
42  
43  
44  
45  
46  
47  
48  
49  
50  
51  
52  
53  
54  
55  
56  
57  
58  
59  
60

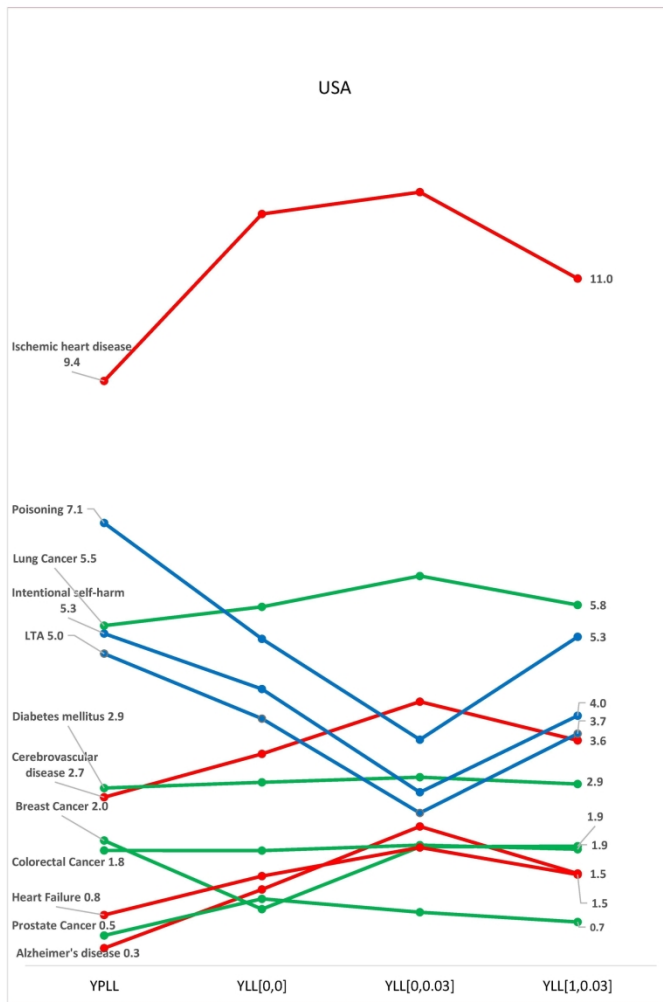

Burden of disease estimates as a proportion of the total burden of disease in USA

209x297mm (300 x 300 DPI)

1  
2  
3  
4  
5  
6  
7  
8  
9  
10  
11  
12  
13  
14  
15  
16  
17  
18  
19  
20  
21  
22  
23  
24  
25  
26  
27  
28  
29  
30  
31  
32  
33  
34  
35  
36  
37  
38  
39  
40  
41  
42  
43  
44  
45  
46  
47  
48  
49  
50  
51  
52  
53  
54  
55  
56  
57  
58  
59  
60

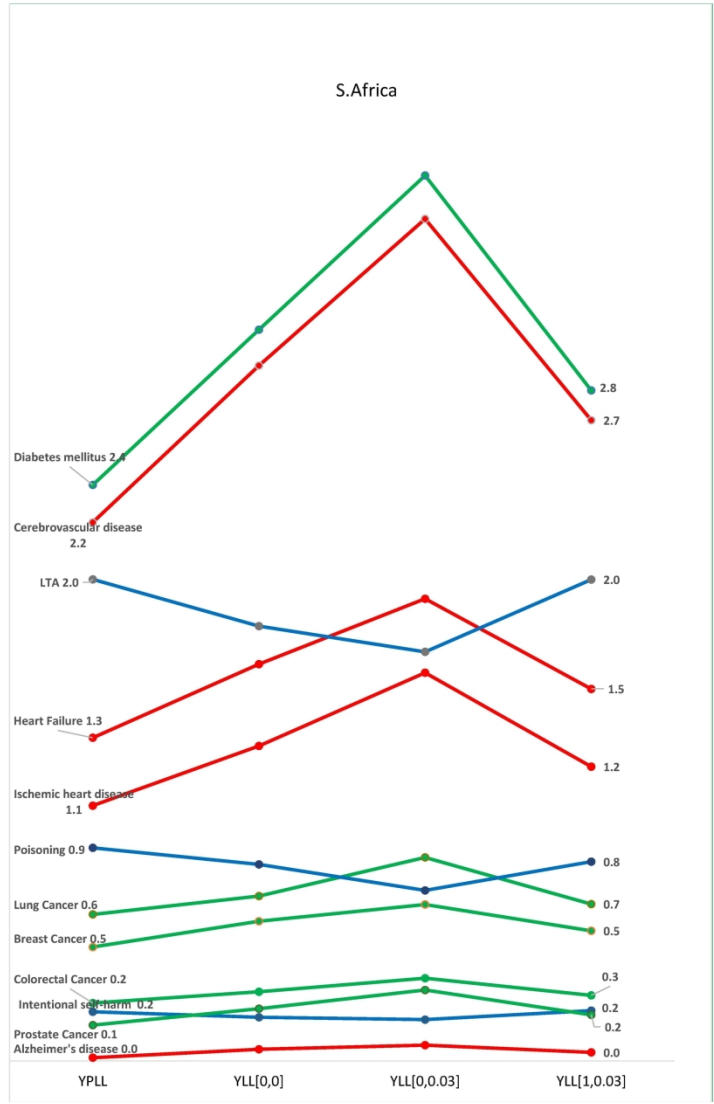

Burden of disease estimates as a proportion of the total burden of disease in South Africa

209x297mm (300 x 300 DPI)

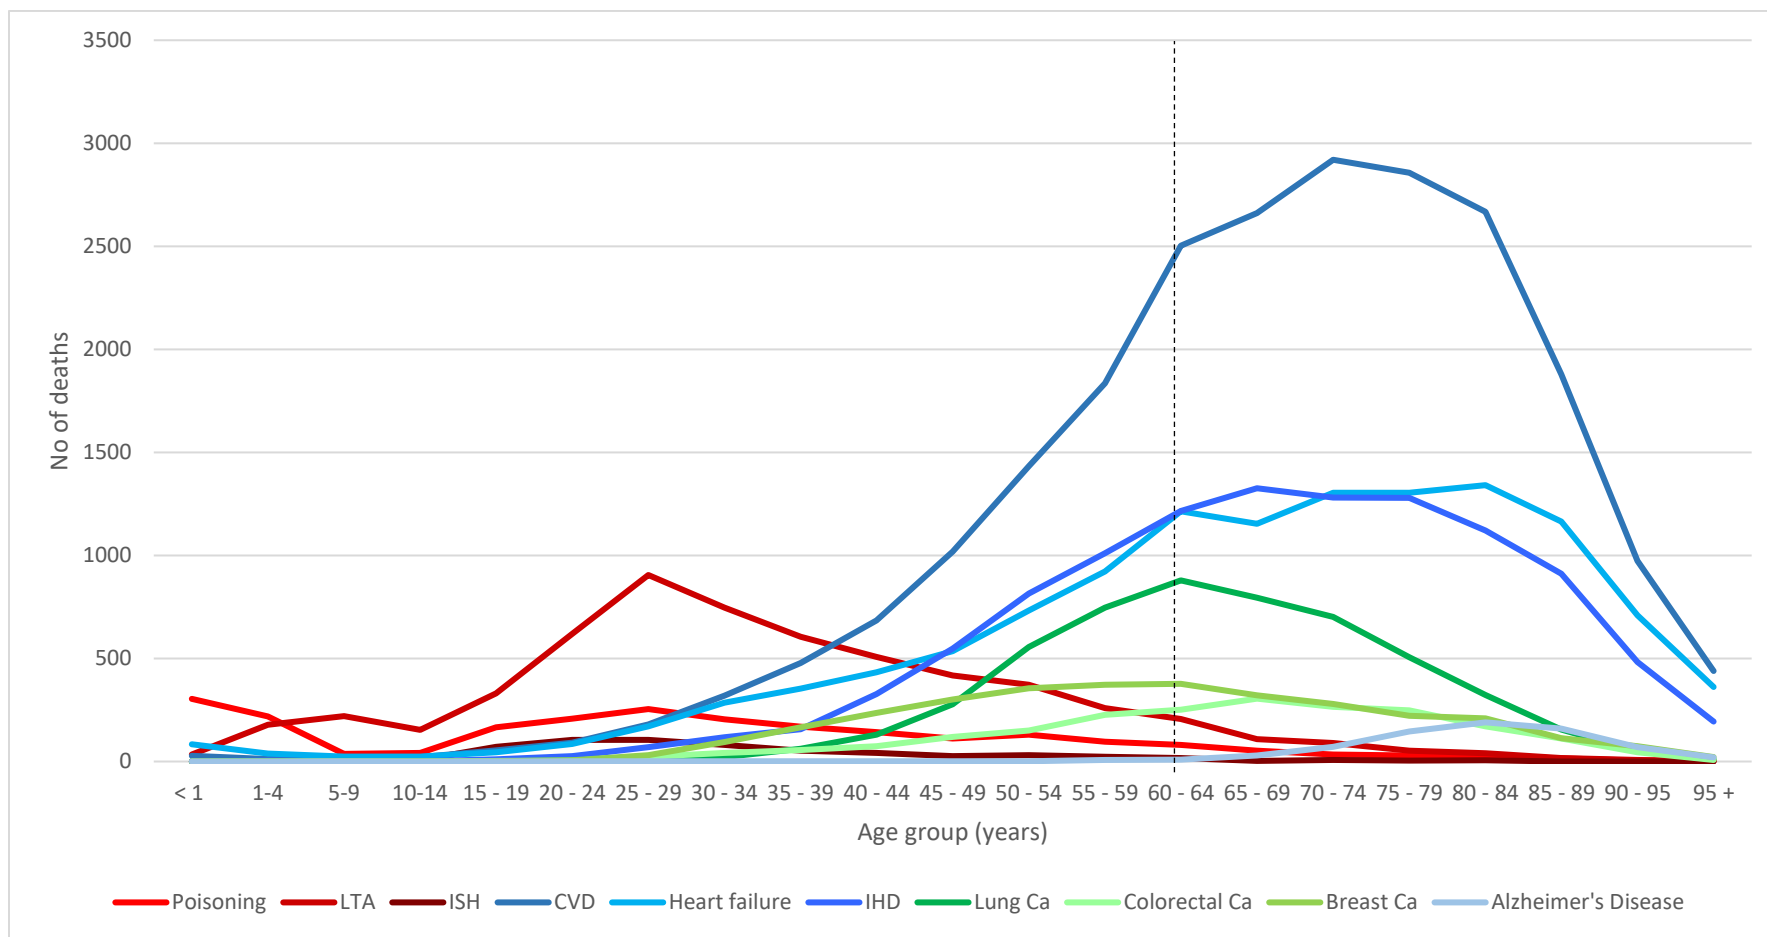

Supplementary fig 1: Age distribution of disease mortality in South Africa. (Dashed line: Life expectancy)

1  
2  
3  
4  
5  
6  
7  
8  
9  
10  
11  
12  
13  
14  
15  
16  
17  
18  
19  
20  
21  
22  
23  
24  
25  
26  
27  
28  
29  
30  
31  
32  
33  
34  
35  
36  
37  
38  
39  
40  
41  
42  
43  
44  
45  
46  
47

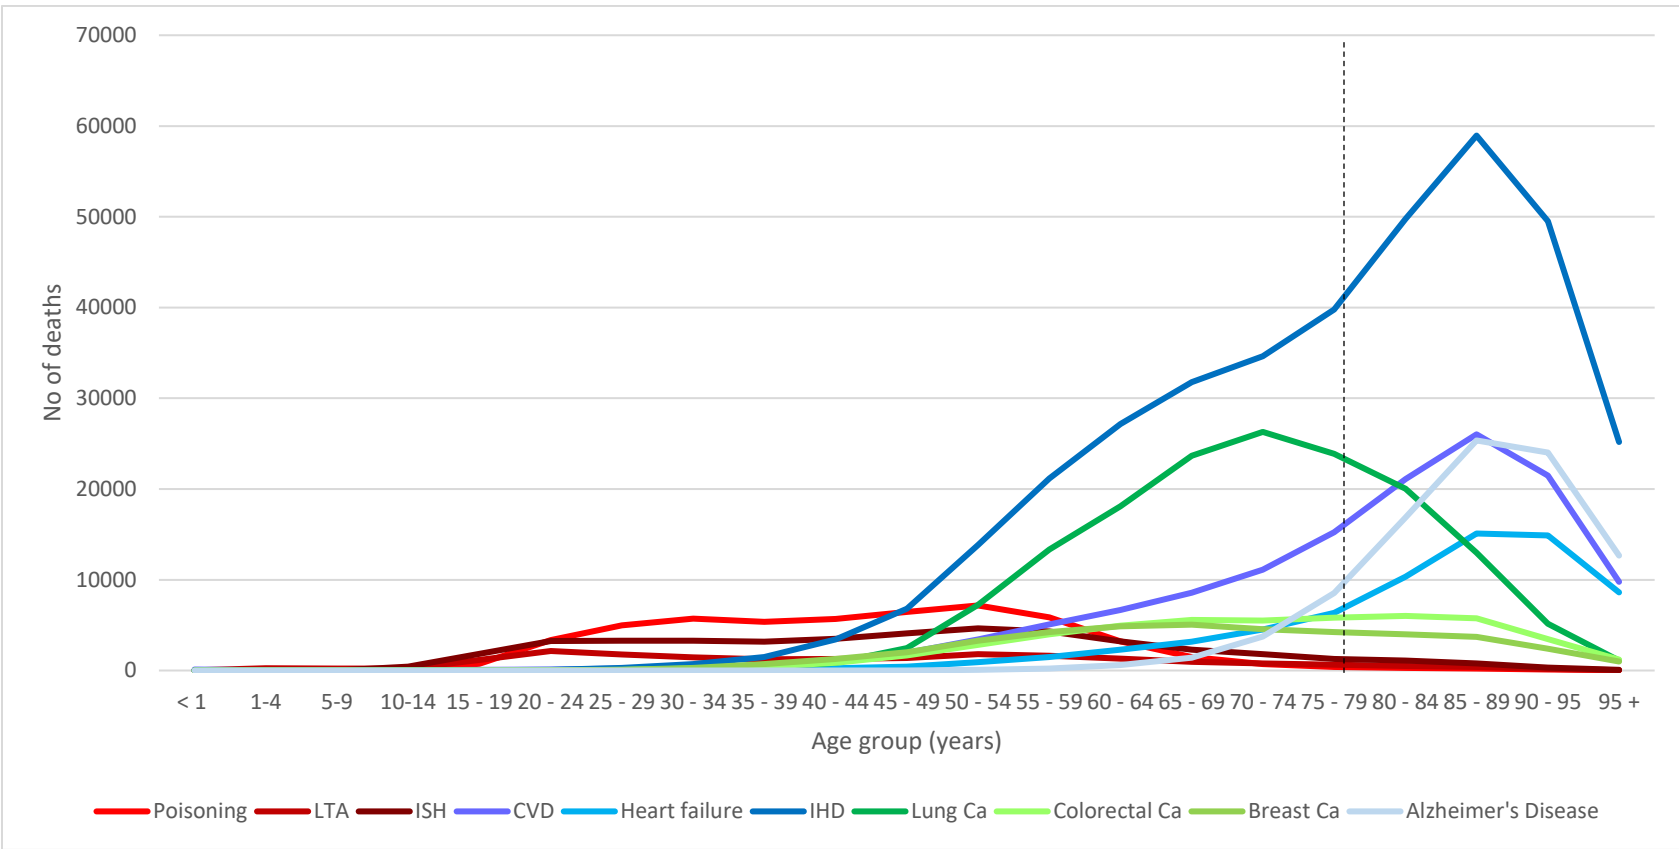

Supplementary fig 2: Age distribution of disease mortality in USA. (Dashed line: Life expectancy)

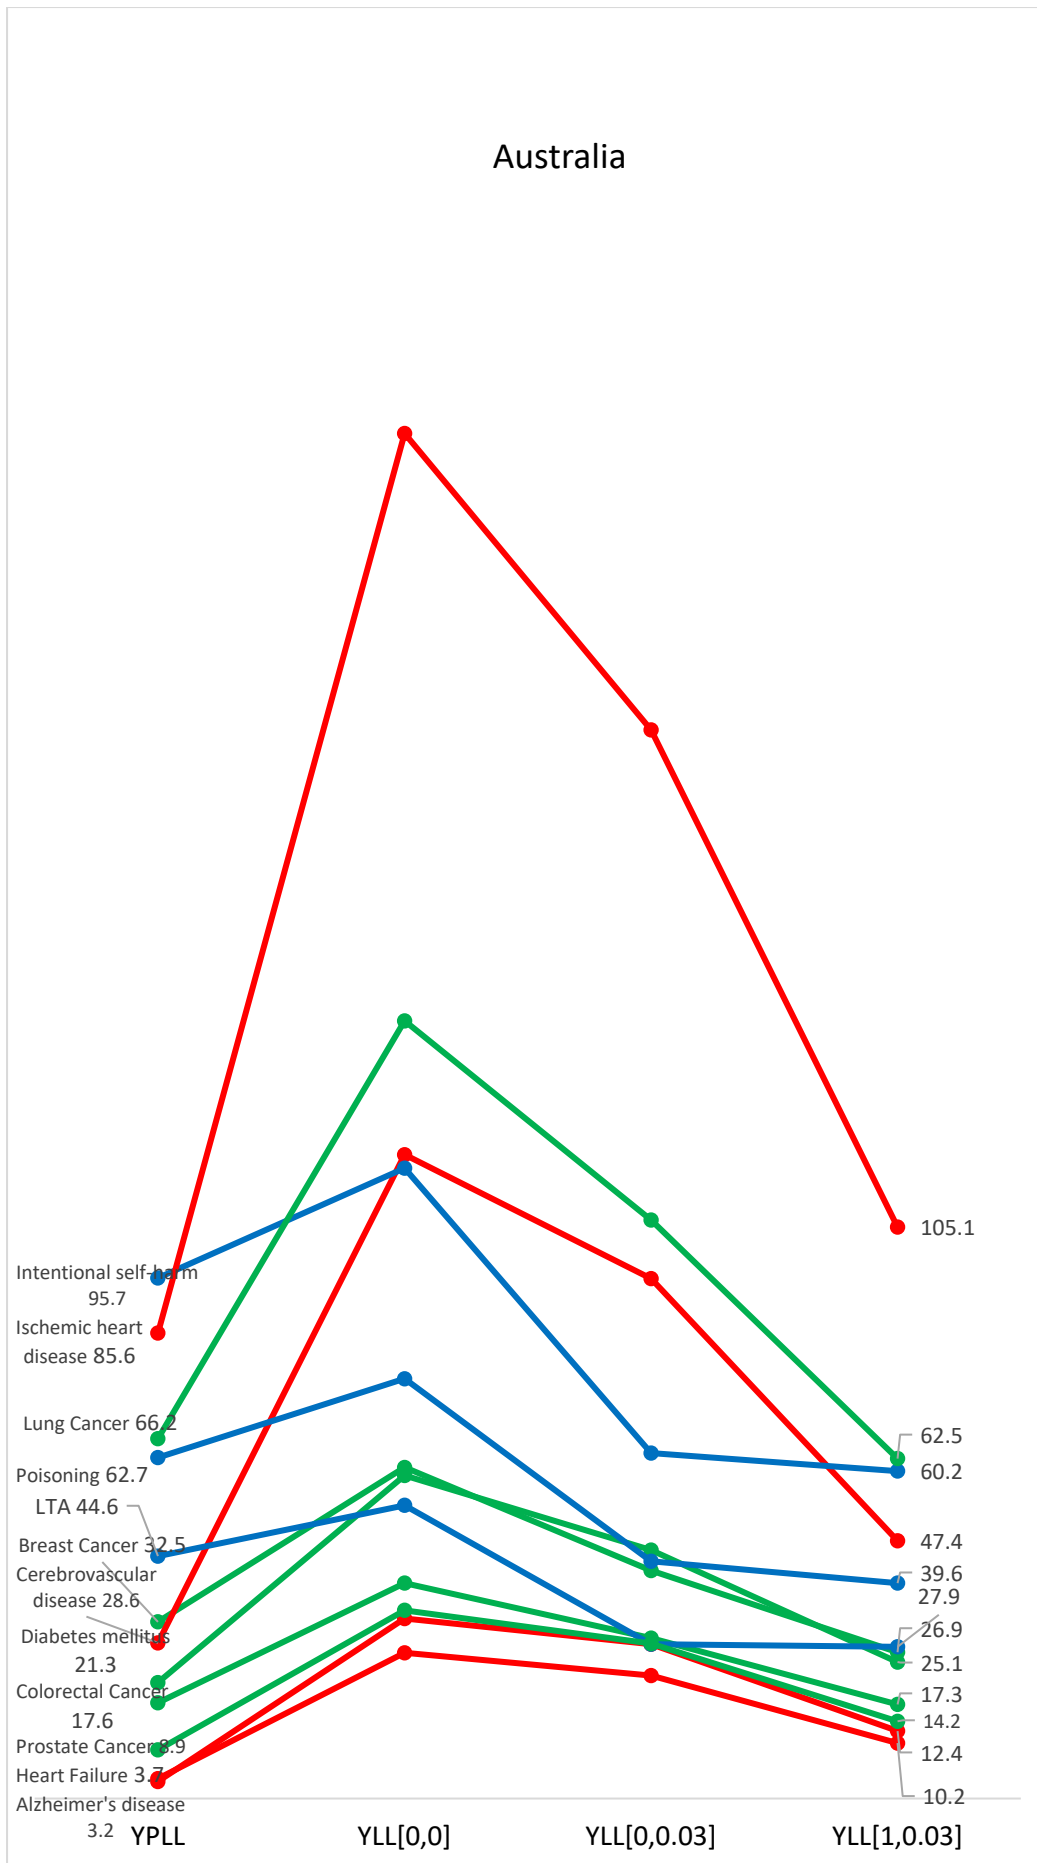

1  
2  
3  
4  
5  
6  
7  
8  
9  
10  
11  
12  
13  
14  
15  
16  
17  
18  
19  
20  
21  
22  
23  
24  
25  
26  
27  
28  
29  
30  
31  
32  
33  
34  
35  
36  
37  
38  
39  
40  
41  
42  
43  
44  
45  
46  
47  
48  
49  
50  
51  
52  
53  
54  
55  
56  
57  
58  
59  
60

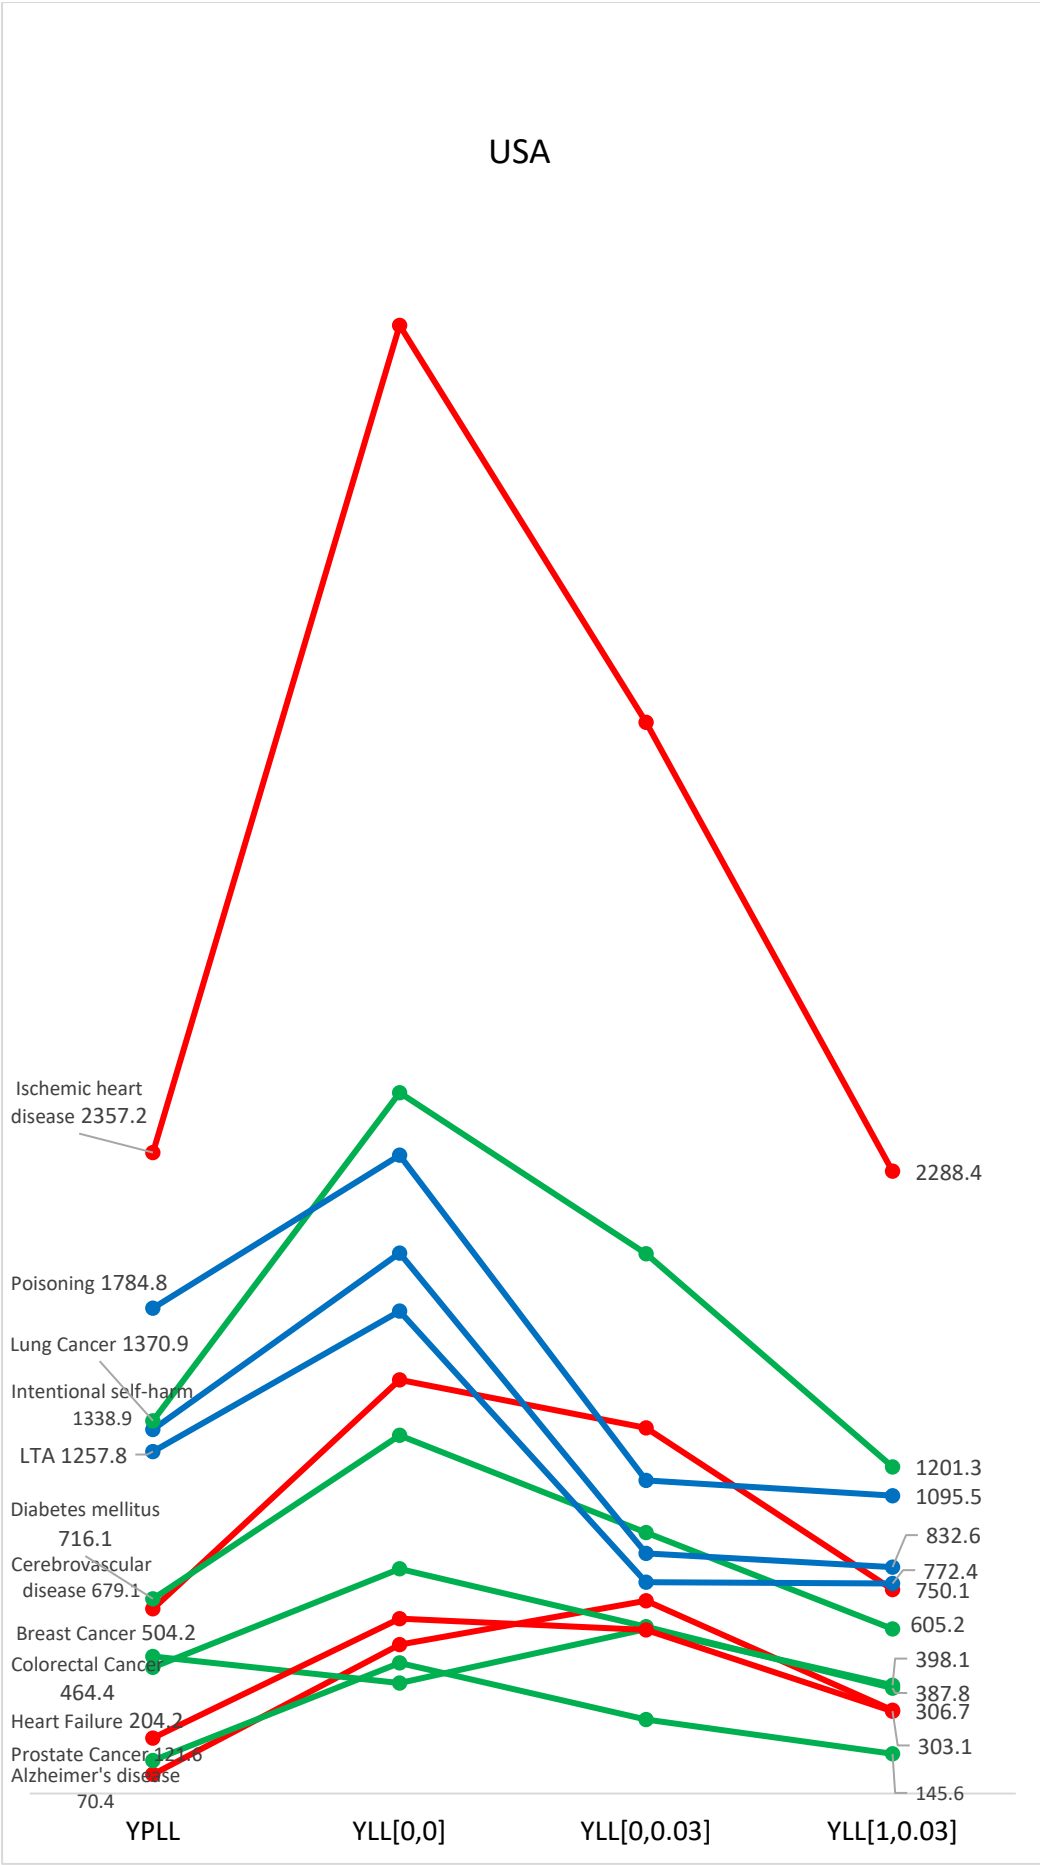



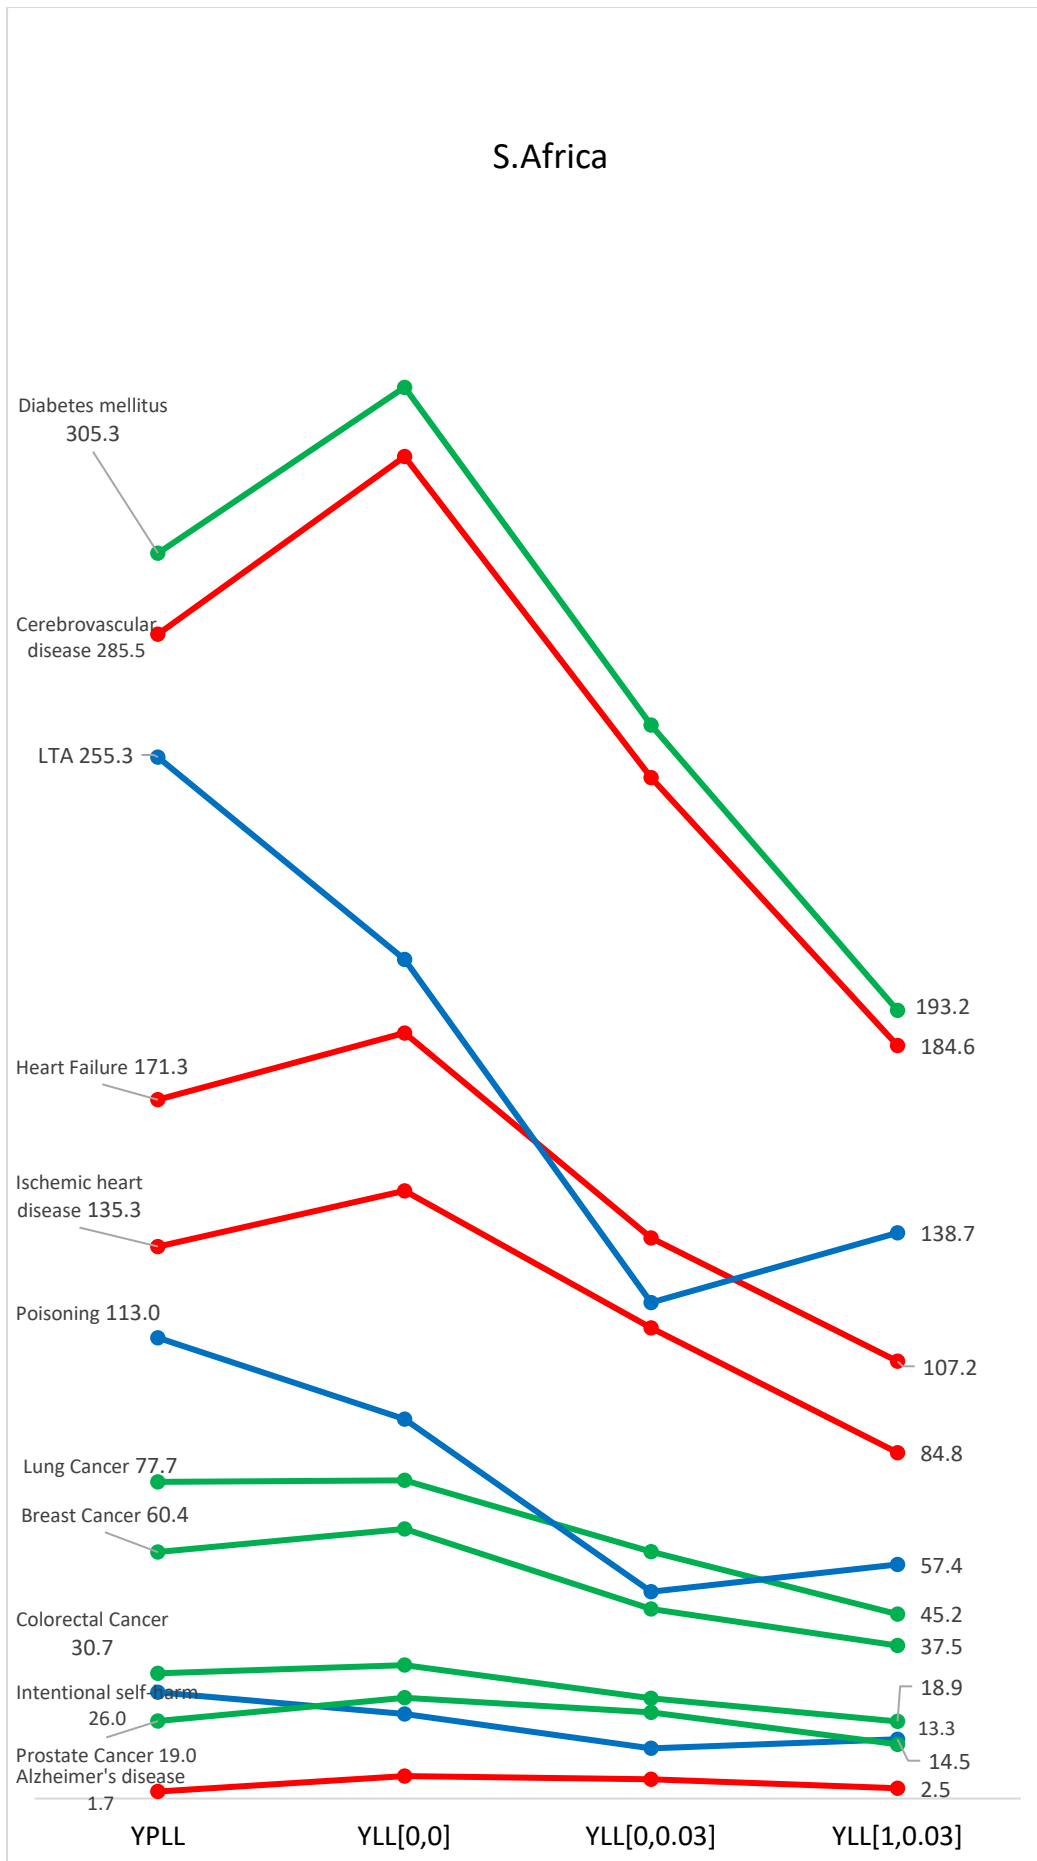

# BMJ Open

## Variability in the burden of disease estimates with or without age weighting and discounting: a methodological study

|                                 |                                                                                                                                                                                           |
|---------------------------------|-------------------------------------------------------------------------------------------------------------------------------------------------------------------------------------------|
| Journal:                        | <i>BMJ Open</i>                                                                                                                                                                           |
| Manuscript ID                   | bmjopen-2018-027825.R2                                                                                                                                                                    |
| Article Type:                   | Research                                                                                                                                                                                  |
| Date Submitted by the Author:   | 24-Jun-2019                                                                                                                                                                               |
| Complete List of Authors:       | Egunsola, Oluwaseun; University of Sydney, Raubenheimer, Jacques; University of Sydney, Discipline of Pharmacology<br>Buckley, Nicholas; University of Sydney, Discipline of Pharmacology |
| <b>Primary Subject Heading</b>: | Epidemiology                                                                                                                                                                              |
| Secondary Subject Heading:      | Epidemiology, Global health, Research methods                                                                                                                                             |
| Keywords:                       | EPIDEMIOLOGY, PUBLIC HEALTH, Health economics < HEALTH SERVICES ADMINISTRATION & MANAGEMENT                                                                                               |
|                                 |                                                                                                                                                                                           |

SCHOLARONE™  
Manuscripts

1  
2  
3  
4  
5 **Variability in the burden of disease estimates with or without age**  
6 **weighting and discounting: a methodological study**  
7  
8  
9

10  
11  
12 Oluwaseun Egunsola, Jacques Raubenheimer, Nicholas Buckley  
13

14  
15  
16  
17 Clinical Pharmacology and Toxicology Research Group, Discipline of Pharmacology, The  
18 University of Sydney, NSW, Australia.  
19  
20  
21  
22  
23  
24  
25  
26  
27  
28  
29  
30  
31  
32

33 **Corresponding author** – Oluwaseun Egunsola: Clinical Pharmacology and Toxicology  
34 Research Group, Discipline of Pharmacology, Level 3, 1-3 Ross Street, School of Medical  
35 Sciences, Sydney Medical School, The University of Sydney, NSW, Australia, 2006  
36  
37  
38

39 **E-mail address** – seunegunsola@yahoo.com  
40

41 **Telephone no** - +61 (0) 286276626  
42  
43  
44  
45  
46  
47  
48  
49  
50  
51  
52  
53  
54  
55  
56  
57  
58  
59  
60

**Word count:** 2226

## ABSTRACT

**Objectives:** This study examines the impact of the type of method used on the estimation of the burden of diseases.

**Design –** Comparison of methods of estimating disease burden

**Setting:** Four metrics of burden of disease estimation namely; years of potential life lost (YPLL), non-age weighted years of life lost (YLL) without discounting, and YLL with uniform or non-uniform age weighting and discounting were used to calculate the burden of selected diseases in three countries: Australia, USA and South Africa.

**Participants:** Mortality data for all individuals from birth were obtained from the World Health Organization (WHO) database.

**Outcomes:** the burden of ten common diseases with four metrics, and the relative contribution of each disease to the overall national burden when each metric is used.

**Results:** There were variations in the burden of disease estimates with the four methods. The standardised YPLL estimates were higher than other methods of calculation for diseases common among young adults and lower for diseases common among the elderly. In the three countries, discounting decreased the contributions of diseases common among younger adults to the total burden of disease; while the contributions of diseases of the elderly increased. After discounting with age weighting, there were no distinct patterns for diseases of the elderly and young adults in the three countries.

**Conclusions:** Given the variability in the estimates of the burden of disease with different approaches, there should be transparency regarding the type of metric used and a generally acceptable method that incorporates all the relevant social values should be developed.

## STRENGTHS AND LIMITATIONS OF THIS STUDY

1. The ten diseases we chose ensured that the large differences in estimates driven by age at death were determined.
2. We relied on WHO data on the burden of 10 important diseases from three different countries, but these data are not comprehensive.
3. Larger or smaller differences might be seen with other diseases, or for other countries.

For peer review only

## INTRODUCTION

The metric for estimating the health status of a population has traditionally been the mortality rate. However, in order to identify and prioritise the causes of premature death, as well as quantify the burden of such deaths on the society, the years of life lost (YLL) and the years of potential life lost (YPLL) measures were developed. Both metrics estimate the average number of years a person would have lived had they not died prematurely. Governments and institutions use these metrics to prioritise health funding and research. The years of life lost concept has been in existence since the 1940s.[1] However, it did not gain traction as a planning tool for health promotion and disease prevention until the 1970s and 1980s.[2] The use of YPLL as a measure of premature mortality was introduced by the US Centres for Disease Control (CDC) in 1982, when they started reporting potential years of life lost before the age of 65.[3] YLL as a component of the Disability-Adjusted Life Year was introduced by the global burden of disease (GBD) study published in 1996.[4]

Although the two measures are somewhat similar with respect to what they measure, they differ in the calculations used. For YLL, the number of deaths at a particular age is multiplied by the standard life expectancy at the age at which death occurs. The results for the respective ages or age bands are then summed.[5] YPLL is calculated as deaths of persons up to a cut-off age threshold with the assumption that deaths occurring before this time are untimely .[6] However, the choice of maximum cut-off age is arbitrary, and has differed between authors, with a profound impact on the resultant estimates.

Deaths beyond the cut-off age, usually the life expectancy in a specific population, are not measurable with YPLL. Social values such as time-based discounting and age weighting can be incorporated into YPLL and YLL calculations. Discount rates estimates the net present value of years of life lost. Some studies, for example, have utilised a discount rate of 3% time

1  
2  
3 of life lost in the future. Which implies that a year of healthy life gained next year is worth 3%  
4 less than healthy life lived now.[5] Discount rates of up to 5% have been used in cost  
5 effectiveness analyses.[7] Age weighting implies that the value of life depends on age, such  
6 that greater weights are assigned to deaths at younger ages and lower weights to deaths at older  
7 ages.[8] Although the World Health Organization (WHO) have adopted the no-discount and  
8 no-age weighting methods,[8] age weighting and time-based discounting are still commonly  
9 used by researchers.[9–11]

10  
11 It is important that proportionate amounts of resources are allocated to disease research and  
12 prevention. How the burden of one disease is perceived relative to others depend on the metric  
13 used and whether adjustments were made to those metrics. In this report, we examine the  
14 impact of the choice of index (YLL or YPLL), age weighting, and discounting on the estimation  
15 of the burden of diseases.

## 31 **METHODS**

32  
33 The 2014 mortality data for three countries, Australia, USA and South Africa, were obtained  
34 from the WHO database. The WHO mortality database contains mortality data by country,  
35 year, age, sex and cause of death, submitted to the WHO by its member states on an annual  
36 basis since 1950. The causes of death on the database are coded according to the International  
37 statistical Classification of Diseases and health related problems 10th revision (ICD-10).[12]  
38 Ten diseases, grouped into three categories were selected. The first group consists of ischemic  
39 heart disease, cerebrovascular disease, Alzheimer's disease and heart failure. These were  
40 diseases with peak mortality after life expectancy. The second group were diseases with peak  
41 mortality in younger adults. These include: poisoning, land transport accidents (LTA) and  
42 intentional self-harm. A third group consisted of diseases including lung cancer, colorectal  
43 cancer and breast cancer, with peak mortality after age 50 but before age of life expectancy at  
44  
45  
46  
47  
48  
49  
50  
51  
52  
53  
54  
55  
56  
57  
58  
59  
60

1  
2  
3 birth (Figure 1 and see Supplementary files 1 and 2). The number of deaths in five-year age  
4 intervals (except for infants and elderly over 85 years old: 0,1–4, 5–9, 10–14, ... 80–84, 85+)  
5 were extracted onto a Microsoft Excel worksheet and the standard life expectancies for the  
6 average ages of deaths (the mean of the lower and upper bound of each age group), for both  
7 males and females were obtained from the WHO standard life tables.[13] YLL was calculated,  
8 using Microsoft Excel, from the sum of the number of deaths due to a disease multiplied by  
9 life expectancy for that age band.  
10  
11  
12  
13  
14  
15  
16  
17  
18  
19

$$YLL = N * L$$

20  
21  
22  
23 Where:

24  
25  
26 N = Number of deaths at a particular age or age band and L is the standard life expectancy for  
27 the age or age band of death.  
28  
29

30  
31 Four metrics were compared:

- 32  
33 • Years of potential life lost: YPLL,
- 34  
35 • YLL without age weighting (uniform weighting) or discounting: YLL [0, 0]
- 36  
37 • YLL with non-uniform age weighting and discounting: YLL [1, 0.03]
- 38  
39 • YLL with uniform age weighting and discounting: YLL [0, 0.03]
- 40  
41  
42  
43  
44  
45

46  
47 Details of the method for calculating non-uniform age weighted (K=1) and non-zero  
48 discounted; as well as 3% discounted and uniform age weighted (K=0) YLL are available in  
49 the WHO practical guide for national burden of disease studies.[14]  
50  
51

52  
53 From this guide, we used formula 11.2.:

$$54  
55  
56 YLL = N / 0.03(1 - e^{-0.03L}) \text{ for 3\% discounting and uniform age weights}$$

57  
58  
59 And for non-zero discounting and age weighting we used formula 11.3:  
60



$$YLL = N C e^{(ra)} / (\beta+r)^2 [e^{-(\beta+r)(L+a)} [-(\beta+r)(L+a)-1] - e^{-(\beta+r)a} [-(\beta+r)a-1]]$$

where N is number of deaths, r is the discount rate of 0.03, C is the age-weighting correction constant of 0.1658,  $\beta$  is the parameter from the age-weighting function value 0.04, a is the age of onset, and L is the duration of disability or time lost due to premature mortality. L was derived from the 2014 WHO life tables for each of the three countries.[13]

To enable comparison, YPLL were calculated by multiplying the number of disease-specific deaths for a given age group by the expected life expectancy for each age group up to a cut off age of 79 years[15] by using the formula:  $YPLL = \sum_x D_x(79-A_x)$

Where  $D_x$  = registered number of deaths at age due to a particular cause of death and  $A_x$  = adjusted age at death.

For each method, the burden of disease was standardised as a percentage of the total national burden of disease, i.e.

$$\text{Standardised burden of disease} = (\text{Burden of disease} / \text{total burden of diseases}) 100$$

The years of life lost for each disease was expressed as the percentage of the total YLL lost in the population due to premature mortality. The total YLL for each country was determined by calculating the sum of the YLL for all ICD 10 disease categories on the WHO mortality database.

**Patients and Public Involvement:** Patients and public were not involved in this study.

## RESULTS

1  
2  
3 There were variations in the contributions of each disease class to the total national burden of  
4 disease in the selected countries, with the four methods of estimation. In all three countries,  
5 burden of disease estimation with YPLL yielded the highest estimates for diseases common  
6 among younger adults, resulting in a higher contribution of these diseases to the total burden  
7 of disease in the respective countries (Figures 2–4). In Australia, the standardised burden of  
8 intentional self-harm was 9.3% with YPLL, compared to 5.1%, 6.0% and 3.9% with YLL  
9 [0, 0], YLL [1, 0.03] and YLL [0, 0.03] respectively. In the USA, the standardised burden of  
10 intentional self-harm was 5.3% with YPLL, compared to 4.4%, 4.0% and 2.8% with YLL  
11 [0, 0], YLL [1, 0.03] and YLL [0, 0.03] respectively. For intentional self-harm in South Africa,  
12 YPLL did not differ from other metrics (0.2% respectively) (Figure 4). Conversely, YPLL  
13 resulted in the lowest estimate of disease burden for diseases common among the elderly. In  
14 the USA, the standardised burden of ischemic heart disease was 9.4% compared to 12.1%,  
15 11.0%, and 12.4%, with YLL [0, 0], YLL [1, 0.03] and YLL [0, 0.03], respectively (Figure 3).  
16  
17 In the three countries, discounting decreased the contributions of diseases common among  
18 younger adults to the total burden of disease; while the contributions of diseases of the elderly  
19 increased (Figures 2–4). In Australia, the standardised burden of ischemic heart disease, heart  
20 failure and Alzheimer’s disease increased from 10.9% to 12%, 1.2% to 1.4% and 1.4% to 1.7%  
21 respectively after discounting without age weighting; while the standardised burden of  
22 intentional self-harm, poisoning and land transport accidents decreased from 5.1% to 3.9%,  
23 3.4% to 2.7% and 2.4% to 1.7%, respectively after discounting without age weighting (Figure  
24 2). A similar pattern was seen with estimates from USA and South Africa (Figures 3 & 4). In  
25 the USA, the standardised burden of intentional self-harm, poisoning and land transport  
26 accidents decreased from 4.4% to 2.8%, 5.2% to 3.6% and 4.0% to 2.4%; while ischemic heart  
27 disease, heart failure and Alzheimer’s disease increased from 12.1% to 12.4%, 1.4% to 1.9%  
28 and 1.2% to 2.2% respectively. In South Africa, Ischemic heart disease, heart failure and  
29  
30  
31  
32  
33  
34  
35  
36  
37  
38  
39  
40  
41  
42  
43  
44  
45  
46  
47  
48  
49  
50  
51  
52  
53  
54  
55  
56  
57  
58  
59  
60

1  
2  
3 Alzheimer's disease increased from 1.3% to 1.6%, 1.6% to 1.9% and 0.05 to 0.07%  
4  
5 respectively after discounting without age weighting; while minimal decreases were seen with  
6  
7 poisoning and land transport accidents 0.8% to 0.7% and 1.8% to 1.7% respectively. There was  
8  
9 no difference between discounted and undiscounted YLL estimates for intentional self-harm  
10  
11 (0.2%). After discounting with age weighting, there were no distinct patterns for diseases of  
12  
13 the old and young in the three countries (Figures 2-4).  
14  
15  
16  
17  
18  
19  
20  
21  
22  
23  
24  
25  
26  
27  
28  
29  
30  
31  
32  
33  
34  
35  
36  
37  
38  
39  
40  
41  
42  
43  
44  
45  
46  
47  
48  
49  
50  
51  
52  
53  
54  
55  
56  
57  
58  
59  
60

For peer review only

## DISCUSSION

We have shown that estimates of the relative burden of diseases are highly dependent on the methods of calculation used. This is especially so for countries with long life expectancy, and for diseases that preferentially affected the young or elderly. The standardised YPLL estimates were relatively higher for diseases common among younger adults, but smaller in absolute terms in the two countries (USA and Australia) with higher life expectancies; conversely, the standardised YPLL estimates were lower for diseases of the elderly. On account of the reduction in the contribution of deaths in older age groups with YPLL estimates, the relative contribution of the causes in younger adults increased. Similarly, discounting without age weighting increased the contribution of diseases of the elderly to the total burden of disease; while the contributions of diseases of younger adults decreased.

The variations in estimates of the burden of disease can change the relative 'importance' of a disease; such that advocates and researchers interested in promoting research on particular diseases could choose an approach that best supports their cause. In our study, intentional self-harm was the most 'burdensome' of all the 10 diseases in Australia using YPLL estimates, ahead of ischemic heart disease, lung cancer and cerebrovascular disease. However, with the uniform weighted YLL with discount method, intentional self-harm decreased in relevance to the fourth most 'burdensome' disease. On account of this variability, transparency in the selection of appropriate methods is important given that these estimates may be important for the prioritisation of diseases for research funding. Gillum et al.[16] showed a positive correlation between burden of disease (measured using various indicators, including YLL) and the amount of research funding received from the US National Institutes of Health in 2006; although the degree of correlation was less than in 1996.[16]

1  
2  
3 The WHO recommends that individual countries should report on their national burden of  
4 disease and they have provided resources on their website for these calculations.[17] The  
5 resources provided are for YLL, which indicates a tacit preference for this method. Some  
6 national agencies, including the Australian Bureau of Statistics and the US CDC, however,  
7 estimate the YPLL. Prior to the 2010 Global Burden of Disease (GBD) study, time-based  
8 discounting with or without age weighting were utilised[18]. In the 1990[4] and 2004[19] GBD  
9 studies, 3% discounting with age weighting was used; while in the 2001 study,[20] 3%  
10 discounting without age weighting was used. Several national burden-of-disease studies have  
11 continued to include time discounting with or without age weighting;[9–11] while some other  
12 studies have utilised neither.[21] Melse et al., in evaluating the burden of disease in the  
13 Netherlands, justified their non-utilisation of age weighting and time-based discounting as a  
14 practical way of maintaining transparency of figures.[21] Barendregts et al.[22] reported that  
15 the addition of age weights to discounted estimates, resulted in ages 0–27 years becoming more  
16 important than 9–54 years. Sensitivity analyses have been recommended to determine the  
17 implications of including or excluding time-based discounting and age weighting in the burden  
18 of disease estimates.[5] Although unweighted YLL without discount generally produced higher  
19 burden estimates than the three other methods for all 10 diseases (see Supplementary files 3-  
20 5), we have shown in this study that the adjusted values with this method were closer to age-  
21 weighted YLL with discount. Both methods yielded results that were consistently between the  
22 two extremes of YPLL and uniform weighted YLL with discount (Figures 2–4).

23  
24  
25  
26  
27  
28  
29  
30  
31  
32  
33  
34  
35  
36  
37  
38  
39  
40  
41  
42  
43  
44  
45  
46  
47  
48  
49  
50 Furthermore, the propriety of age weighting and discounting is a controversial subject and  
51 different authors have argued for or against them. Notably, Murray and Acharya opined that  
52 age weighting should not be a social construct that is based on our relative desire to take care  
53 of children and the elderly, but rather a system premised on how productive an age group is  
54 and the need to prioritise their wellbeing.[23] Anand and Hanson argued that all lives are equal  
55  
56  
57  
58  
59  
60

1  
2  
3 in importance and disagreed that people's lives should be valued in terms of their productivity.  
4  
5 They also suggested that discounting and weighting reduces the YLL in females relative to  
6  
7 males.[24]  
8  
9

10 Age weighting attaches different values to life years lived at different ages. Lower weights are  
11  
12 usually given to years of healthy life at very young and old ages than for other ages. Time-  
13  
14 based discounting is useful in health economics research; it is included in YLL calculation to  
15  
16 reflect the preference on life years closer to the present. However, there are sociocultural factors  
17  
18 worthy of consideration. For example, the value of a year of life gained now compared to one  
19  
20 gained in 10 years will depend on societal perceptions of life. Also, when an economic value  
21  
22 is attached to a year of life lost, the total values can differ significantly depending on which  
23  
24 method is used to calculate the number of years lost.  
25  
26  
27  
28  
29

30 Using YPLL to rank prematurity-related mortality also has its drawbacks. It does not account  
31  
32 for deaths beyond the life expectancy at birth for the country or beyond an arbitrarily selected  
33  
34 cut-off age, essentially assigning no burden to death at older ages. Therefore, reporting YPLL  
35  
36 often requires a reference to the age threshold against which the YPLL was calculated. YPLL  
37  
38 therefore generally underestimates the years lost to disease common in old age. The gulf  
39  
40 between YPLL and YLL estimates can be accentuated in countries with aging populations and  
41  
42 ranking can also be tilted in favour of diseases that are common early in life.  
43  
44  
45  
46

47 This study has several limitations. We have examined the diseases based on the ICD-10 broad  
48  
49 categorisation. Therefore our estimations have not examined the diseases at a granular level.  
50  
51 Comparing the burden of disease estimation for the individual diseases is complex in the  
52  
53 absence of an objective selection process, however we have used three crude age categories to  
54  
55 select the diseases.  
56  
57  
58  
59  
60

1  
2  
3 In conclusion, the choice of appropriate metrics of disease burden is important for the  
4 prioritisation of research funding. Given the variability in the estimates of the burden of disease  
5 with different approaches, there should be transparency regarding the type of metric used and  
6 a generally acceptable method that incorporates all the relevant social values should be  
7 developed.  
8  
9  
10  
11  
12  
13  
14  
15  
16  
17  
18  
19  
20  
21  
22  
23  
24  
25  
26  
27  
28  
29  
30  
31  
32  
33  
34  
35  
36  
37  
38  
39  
40  
41  
42  
43  
44  
45  
46  
47  
48  
49  
50  
51  
52  
53  
54  
55  
56  
57  
58  
59  
60

For peer review only

1  
2  
3  
4  
5  
6 **Competing interests:** The authors declare that they have no competing interests  
7  
8

9 **Funding statement:** This work was supported by the National Health and Medical Research  
10 Council (NHMRC) through the Translational Australian Clinical Toxicology Program (TACT)  
11 (grant ID1055176).  
12  
13  
14

15  
16 **Authors' contributions:** OE and NB conceptualised and designed the study. OE and JR  
17 analysed the data. OE wrote the initial draft of the manuscript. JR and NB critically reviewed  
18 the manuscript. All authors read and approved the final manuscript.  
19  
20  
21  
22

23  
24 **Data sharing statement:** Reusable data for calculated burden of disease estimates are  
25 available anytime upon request from Dr Oluwaseun Egunsola. Orcid ID: 0000-0002-0500-  
26 9501.  
27  
28  
29  
30  
31  
32  
33  
34  
35  
36  
37  
38  
39  
40  
41  
42  
43  
44  
45  
46  
47  
48  
49  
50  
51  
52  
53  
54  
55  
56  
57  
58  
59  
60



**REFERENCES**

- 1 Haenszel W. A standardized rate for mortality defined in units of lost years of life. *Am J Public Health* 1950;**40**:17–26.
- 2 Perloff J, LeBailly S, Kletke P, *et al.* Premature death in the United States: years of life lost and health priorities. *J Public Heal Policy* 1984;**5**:167–84.
- 3 Centre for Disease Control. Premature deaths, monthly mortality, and monthly physician contacts--United States. MMWR Morbidity and mortality weekly report 1982. 1982. <https://www.cdc.gov/mmwr/preview/mmwrhtml/lmrk019.htm>
- 4 Murray, CJ Lopez A. A comprehensive assessment of mortality and disability from disease, injuries and risk factors in 1990 and projected to 2020. In: *The Global Burden of Disease*. Geneva: : World Health Organization 1996. <http://www.who.int/iris/handle/10665/41864>
- 5 Prüss-Üstün A, Mathers C, Corvalán C, *et al.* Introduction and methods: assessing the environmental burden of disease at national and local levels. 2003. [http://www.who.int/quantifying\\_ehimpacts/publications/en/9241546204.pdf](http://www.who.int/quantifying_ehimpacts/publications/en/9241546204.pdf) (accessed 14 Jun 2018).
- 6 Gardner JW, Sanborn JS. Years of potential life lost (YPLL)—what does it measure? *Epidemiology* 1990;**1**:322–9. doi:10.1097/00001648-199007000-00012
- 7 Sanders GD, Neumann PJ, Basu A, *et al.* Recommendations for conduct, methodological practices, and reporting of cost-effectiveness analyses: Second panel on cost-effectiveness in health and medicine. *JAMA - J Am Med Assoc* 2016;**316**:1093–103. doi:10.1001/jama.2016.12195

- 1  
2  
3 8 WHO Department of Health Statistics and Information Systems. WHO methods and  
4 data sources for global burden of disease estimates 2000-2011. Geneva: 2013.  
5  
6 doi:10.1016/j.jaad.2007.03.004  
7  
8  
9  
10  
11 9 Oliva-Moreno J, Peña-Longobardo L, Alonso S. Loss of labour productivity caused by  
12 disease and health problems: What is the magnitude of its effect on Spain's Economy?  
13 *Eur J Heal Econ* 2012;**27**:631–637. doi:10.1007/s10198-011-0344-9  
14  
15  
16  
17  
18 10 Yoon J, Seo H, Oh IH, *et al.* The non-communicable disease burden in Korea:  
19 Findings from the 2012 Korean burden of disease study. *J Korean Med Sci* Published  
20 Online First: 2016. doi:10.3346/jkms.2016.31.S2.S158  
21  
22  
23  
24  
25  
26 11 Maniecka-Bryła I, Bryła M, Bryła P, *et al.* The burden of premature mortality in  
27 Poland analysed with the use of standard expected years of life lost. *BMC Public Heal*  
28 2015;**15**:101.  
29  
30  
31  
32  
33 12 World Health Organization. Health statistics and information systems: WHO Mortality  
34 database. [http://www.who.int/healthinfo/mortality\\_data/en/](http://www.who.int/healthinfo/mortality_data/en/) (accessed 21 Jul 2017).  
35  
36  
37  
38 13 WHO Department of Health Statistics and Information Systems. Global Health  
39 Observatory data repository.  
40  
41  
42 2016.<http://apps.who.int/gho/data/node.main.LIFECOUNTRY?lang=en> (accessed 24  
43 Mar 2019).  
44  
45  
46  
47  
48 14 Mathers C, Vos T, Lopez A, *et al.* *National burden of disease studies: a practical*  
49 *guide*. 2nd ed. Geneva: : World Health Organization 2001.  
50  
51  
52  
53 15 Australian Bureau of Statistics. Causes of Death, Australia, 2017.  
54 2018.[https://www.abs.gov.au/AUSSTATS/abs@.nsf/Lookup/3303.0Explanatory](https://www.abs.gov.au/AUSSTATS/abs@.nsf/Lookup/3303.0ExplanatoryNotes12017?OpenDocument)  
55 Notes12017?OpenDocument (accessed 24 Mar 2019).  
56  
57  
58  
59  
60

- 1  
2  
3 16 Gillum LA, Gouveia C, Dorsey E, *et al.* NIH disease funding levels and burden of  
4 disease. *PLoS One* 2011;**6**:e16837. doi:10.1371/journal.pone.0016837  
5  
6  
7  
8  
9 17 World Health Organization. Health statistics and information systems: National tools  
10 2017. 2017.[http://www.who.int/healthinfo/global\\_burden\\_disease/tools\\_national/en/](http://www.who.int/healthinfo/global_burden_disease/tools_national/en/)  
11 accessed (accessed 21 Jul 2017).  
12  
13  
14  
15  
16 18 Devleeschauwer B, Havelaar AH, Maertens De Noordhout C, *et al.* Calculating  
17 disability-adjusted life years to quantify burden of disease. *Int J Public Health*  
18 2014;**59**:565–9. doi:10.1007/s00038-014-0552-z  
19  
20  
21  
22  
23  
24 19 World Health Organization, WHO. *The global burden of disease: 2004 update.*  
25 Geneva: : World Health Organization 2008. doi:10.2471/BLT.09.070565  
26  
27  
28  
29 20 Lopez A, Mathers C, Ezzati M, *et al.* *Global Burden of Disease and Risk Factors.* New  
30 York: : Oxford University Press 2006.  
31  
32  
33  
34 21 Melse J, Essink-Bot M-L, Kramers P, *et al.* A national burden of disease calculation:  
35 Dutch disability-adjusted life-years. *Am J Public Heal* 2000;**90**:1241.  
36  
37  
38  
39 22 Barendregt JJ, Bonneux L, Van Der Maas PJ. DALYs: The age-weights on balance.  
40 *Bull World Health Organ* 1996;**74**:439–43.  
41  
42  
43  
44 23 Murray CJL, Acharya AK. Understanding DALYs. *J Health Econ* 1997;**16**:703–30.  
45 doi:10.1016/S0167-6296(97)00004-0  
46  
47  
48  
49 24 Anand S, Hanson K. Disability-adjusted life years: A critical review. *J Health Econ*  
50 1997;**16**:685–702. doi:10.1016/S0167-6296(97)00005-2  
51  
52  
53  
54  
55  
56  
57  
58  
59  
60

1  
2  
3  
4  
5  
6  
7  
8  
9  
10  
11  
12  
13  
14  
15  
16  
17  
18  
19  
20  
21  
22  
23  
24  
25  
26  
27  
28  
29  
30  
31  
32  
33  
34  
35  
36  
37  
38  
39  
40  
41  
42  
43  
44  
45  
46  
47  
48  
49  
50  
51  
52  
53  
54  
55  
56  
57  
58  
59  
60

### Figure titles and legends

**Figure 1:** Age distribution of disease mortality in Australia (Dashed line: life expectancy for Australia)

**Figure 2:** Burden of disease estimates as a proportion of the total burden of disease in Australia.  $K=1$  represents non-uniform age weighting,  $K=0$  represents uniform age weighting,  $r$  is the discount rate of 3%.

**Figure 3:** Burden of disease estimates as a proportion of the total burden of disease in USA.

$K=1$  represents age weighting,  $K=0$  represents no age weighting,  $r$  is the discount rate of 3%.

**Figure 4:** Burden of disease estimates as a proportion of the total burden of disease in South Africa.

$K=1$  represents age weighting,  $K=0$  represents no age weighting,  $r$  is the discount rate of 3%.

1  
2  
3  
4  
5  
6  
7  
8  
9  
10  
11  
12  
13  
14  
15 **Supplementary files:**  
16

17  
18 Supplementary file 1: Age distribution of disease mortality in South Africa.  
19

20  
21 Supplementary file 2: Age distribution of disease mortality in USA.  
22

23  
24 Supplementary file 3: Unstandardized burden of disease estimates (in '000 years) for Australia  
25

26  
27 Supplementary file 4 Unstandardized burden of disease estimates (in '000 years) for USA using  
28  
29 4 methods  
30

31  
32 Supplementary file 5: Unstandardized burden of disease estimates (in '000 years) for South  
33  
34 Africa using 4 methods  
35  
36  
37  
38  
39  
40  
41  
42  
43  
44  
45  
46  
47  
48  
49  
50  
51  
52  
53  
54  
55  
56  
57  
58  
59  
60

1  
2  
3  
4  
5  
6  
7  
8  
9  
10  
11  
12  
13  
14  
15  
16  
17  
18  
19  
20  
21  
22  
23  
24  
25  
26  
27  
28  
29  
30  
31  
32  
33  
34  
35  
36  
37  
38  
39  
40  
41  
42  
43  
44  
45  
46  
47  
48  
49  
50  
51  
52  
53  
54  
55  
56  
57  
58  
59  
60



Age distribution of disease mortality in Australia (Dashed line: life expectancy for Australia)

279x215mm (300 x 300 DPI)

1  
2  
3  
4  
5  
6  
7  
8  
9  
10  
11  
12  
13  
14  
15  
16  
17  
18  
19  
20  
21  
22  
23  
24  
25  
26  
27  
28  
29  
30  
31  
32  
33  
34  
35  
36  
37  
38  
39  
40  
41  
42  
43  
44  
45  
46  
47  
48  
49  
50  
51  
52  
53  
54  
55  
56  
57  
58  
59  
60

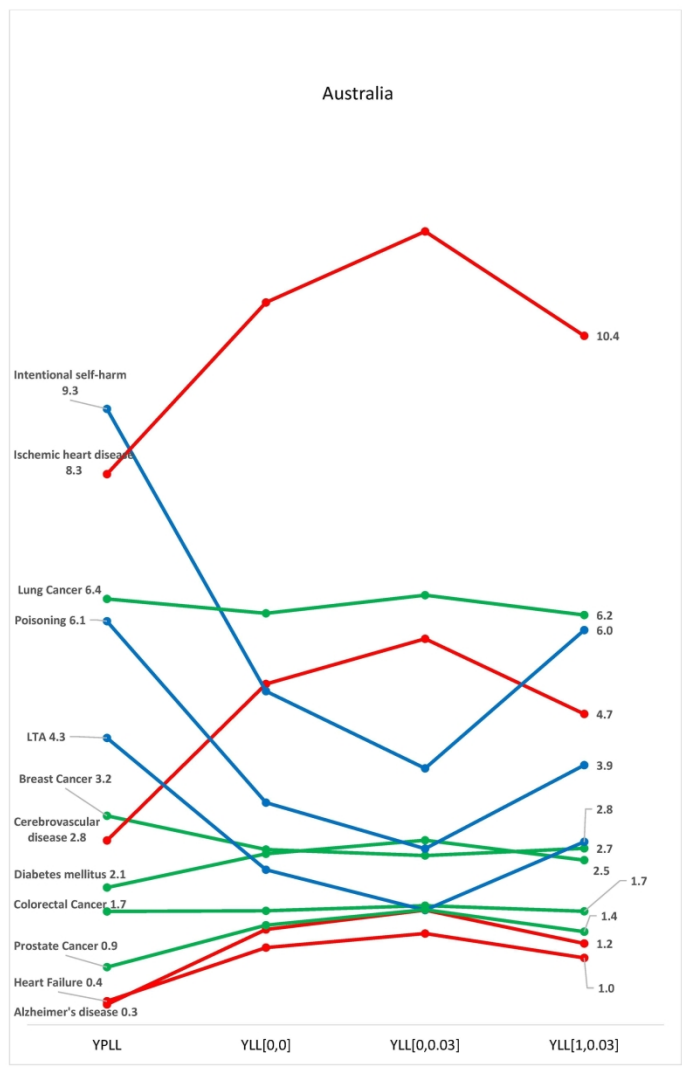

Burden of disease estimates as a proportion of the total burden of disease in Australia  
 209x297mm (300 x 300 DPI)

1  
2  
3  
4  
5  
6  
7  
8  
9  
10  
11  
12  
13  
14  
15  
16  
17  
18  
19  
20  
21  
22  
23  
24  
25  
26  
27  
28  
29  
30  
31  
32  
33  
34  
35  
36  
37  
38  
39  
40  
41  
42  
43  
44  
45  
46  
47  
48  
49  
50  
51  
52  
53  
54  
55  
56  
57  
58  
59  
60



Burden of disease estimates as a proportion of the total burden of disease in USA

209x297mm (300 x 300 DPI)



1  
2  
3  
4  
5  
6  
7  
8  
9  
10  
11  
12  
13  
14  
15  
16  
17  
18  
19  
20  
21  
22  
23  
24  
25  
26  
27  
28  
29  
30  
31  
32  
33  
34  
35  
36  
37  
38  
39  
40  
41  
42  
43  
44  
45  
46  
47  
48  
49  
50  
51  
52  
53  
54  
55  
56  
57  
58  
59  
60



Burden of disease estimates as a proportion of the total burden of disease in South Africa  
209x297mm (300 x 300 DPI)

1  
2  
3  
4  
5  
6  
7  
8  
9  
10  
11  
12  
13  
14  
15  
16  
17  
18  
19  
20  
21  
22  
23  
24  
25  
26  
27  
28  
29  
30  
31  
32  
33  
34  
35  
36  
37  
38  
39  
40  
41  
42  
43  
44  
45  
46  
47

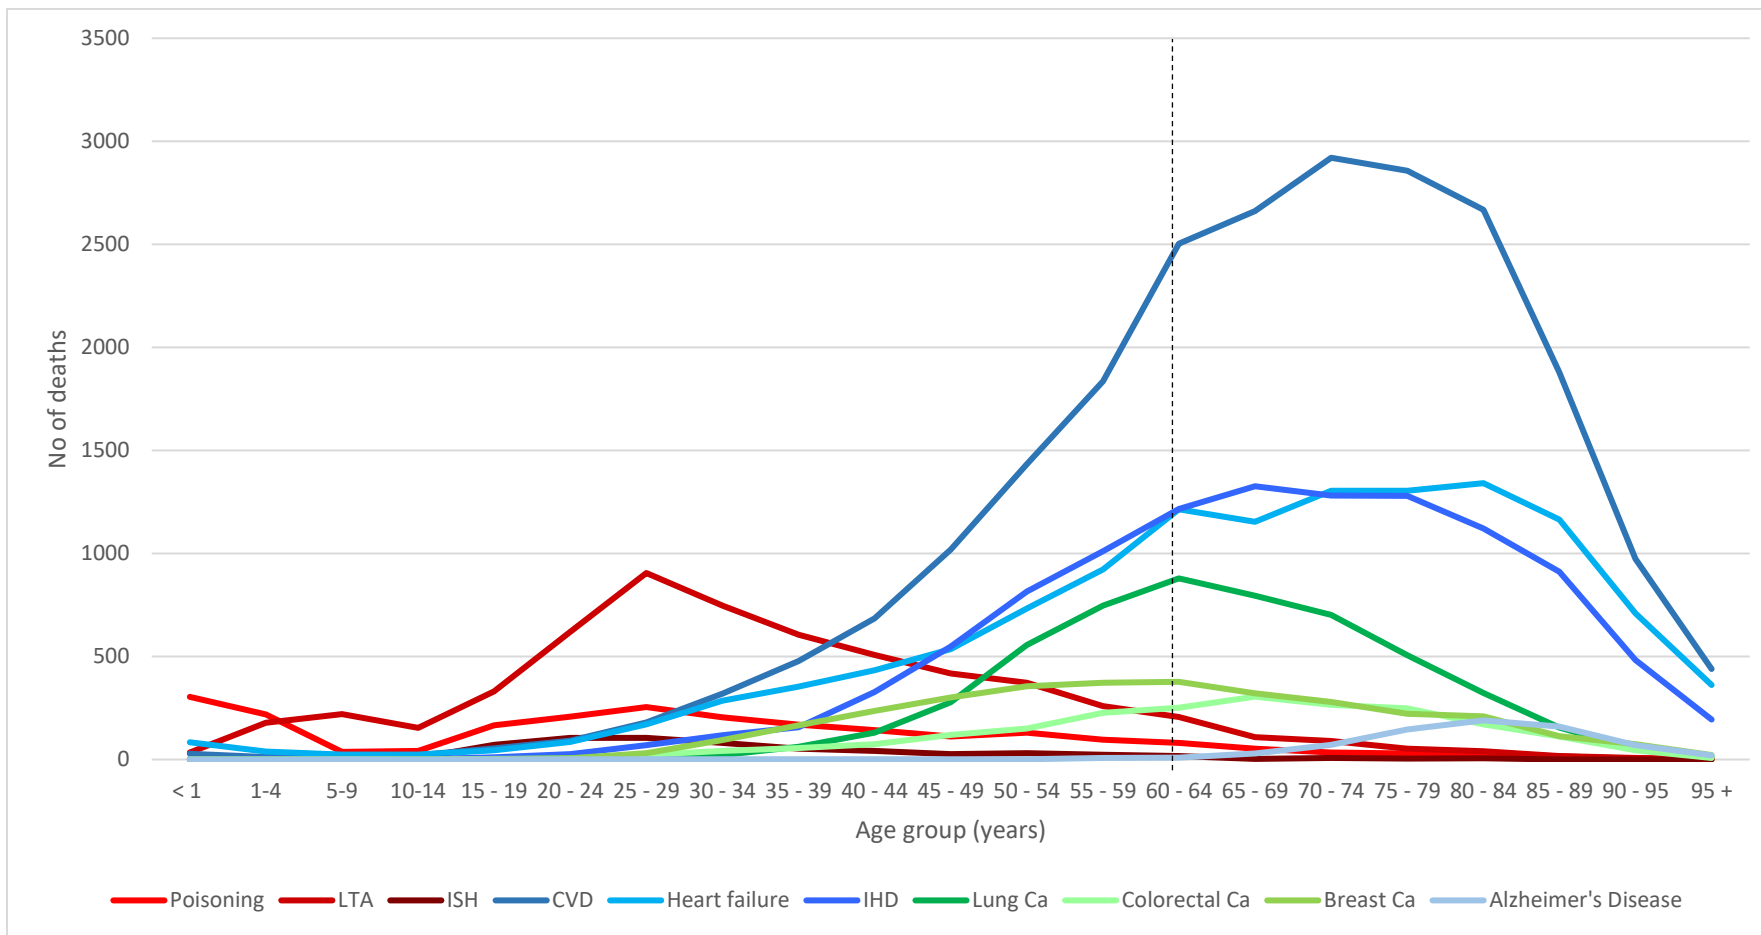

Supplementary fig 1: Age distribution of disease mortality in South Africa. (Dashed line: Life expectancy)

1  
2  
3  
4  
5  
6  
7  
8  
9  
10  
11  
12  
13  
14  
15  
16  
17  
18  
19  
20  
21  
22  
23  
24  
25  
26  
27  
28  
29  
30  
31  
32  
33  
34  
35  
36  
37  
38  
39  
40  
41  
42  
43  
44  
45  
46  
47



Supplementary fig 2: Age distribution of disease mortality in USA. (Dashed line: Life expectancy)

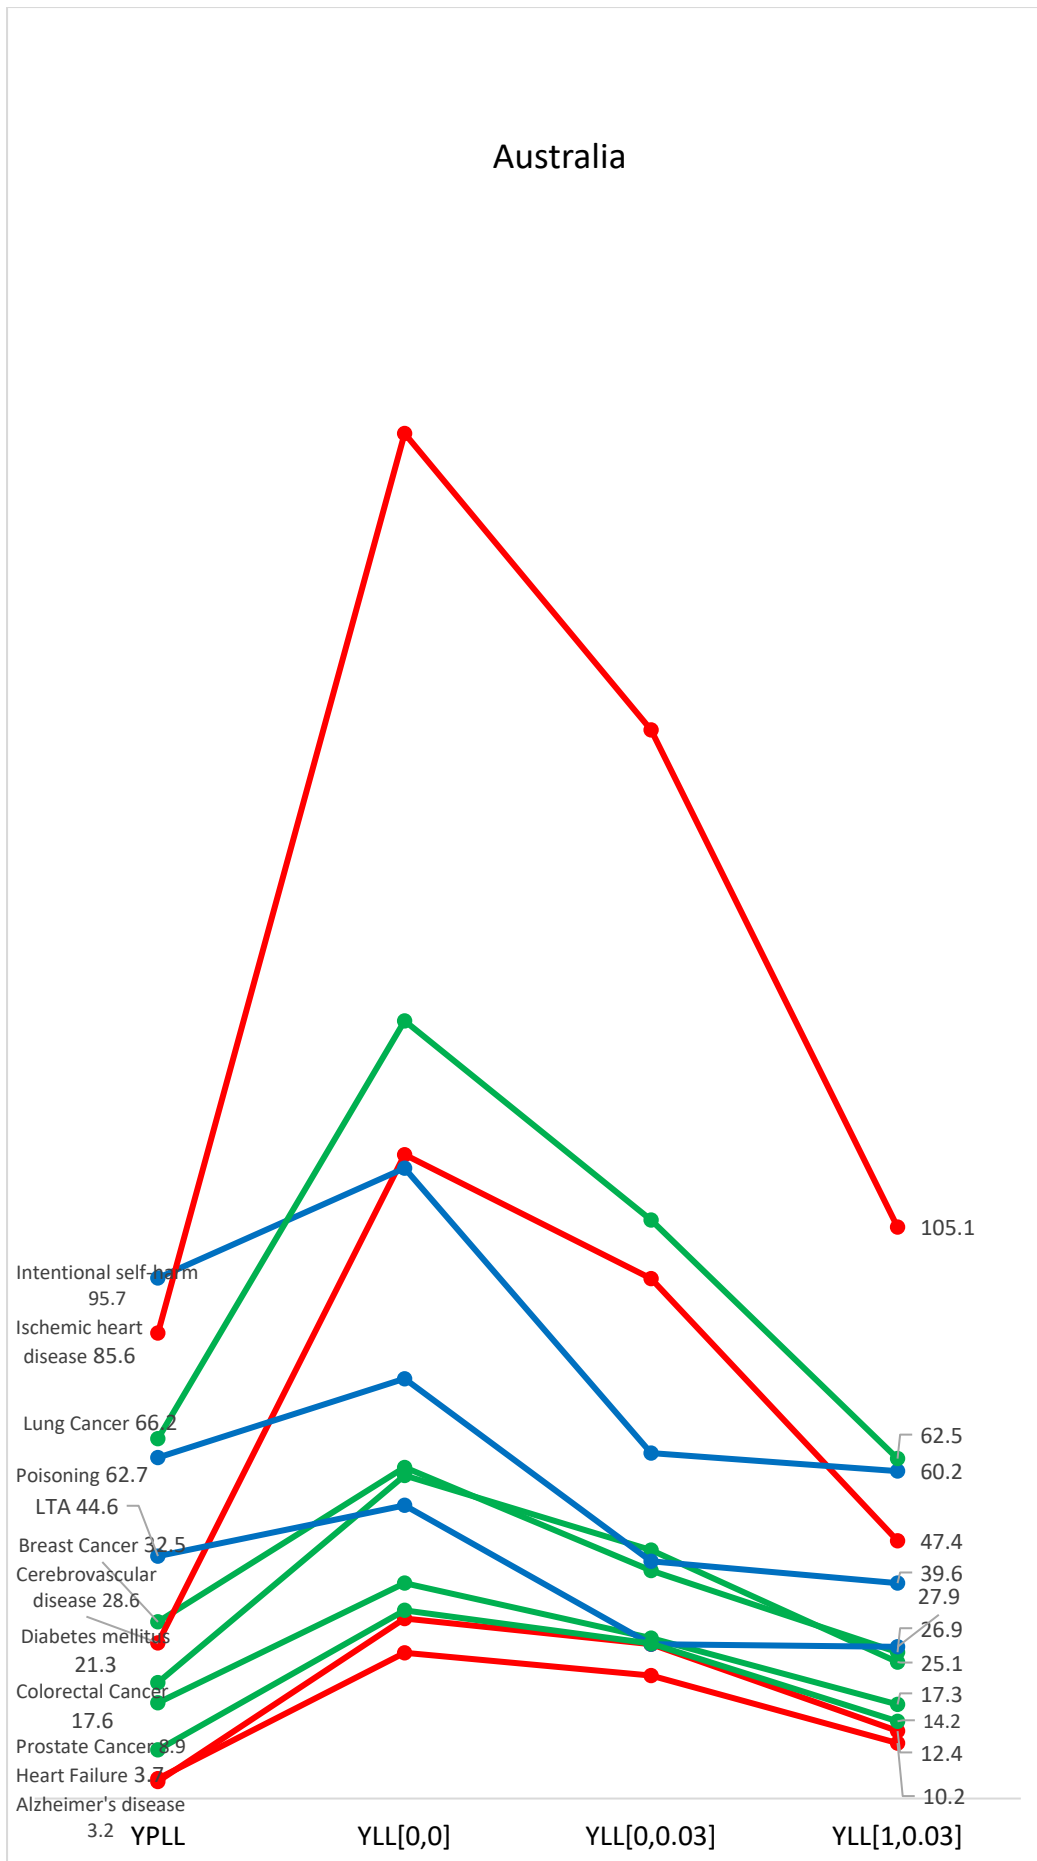

1  
2  
3  
4  
5  
6  
7  
8  
9  
10  
11  
12  
13  
14  
15  
16  
17  
18  
19  
20  
21  
22  
23  
24  
25  
26  
27  
28  
29  
30  
31  
32  
33  
34  
35  
36  
37  
38  
39  
40  
41  
42  
43  
44  
45  
46  
47  
48  
49  
50  
51  
52  
53  
54  
55  
56  
57  
58  
59  
60





Supplement: bmjopen-2018-027825.draft_revisions.pdf [file bmjopen-2018-027825.draft_revisions.pdf]
