# Supplementary material for: Variability in the burden of disease estimates with or without age weighting and discounting: a methodological study
Source: PubMed Central journal article supplement — BMJ Open. 2019 Aug 18;9(8):e027825. doi: 10.1136/bmjopen-2018-027825 (PMC6701586; doi:10.1136/bmjopen-2018-027825), 2019-08-18
Supplement: bmjopen-2018-027825supp001.pdf [file bmjopen-2018-027825supp001.pdf]

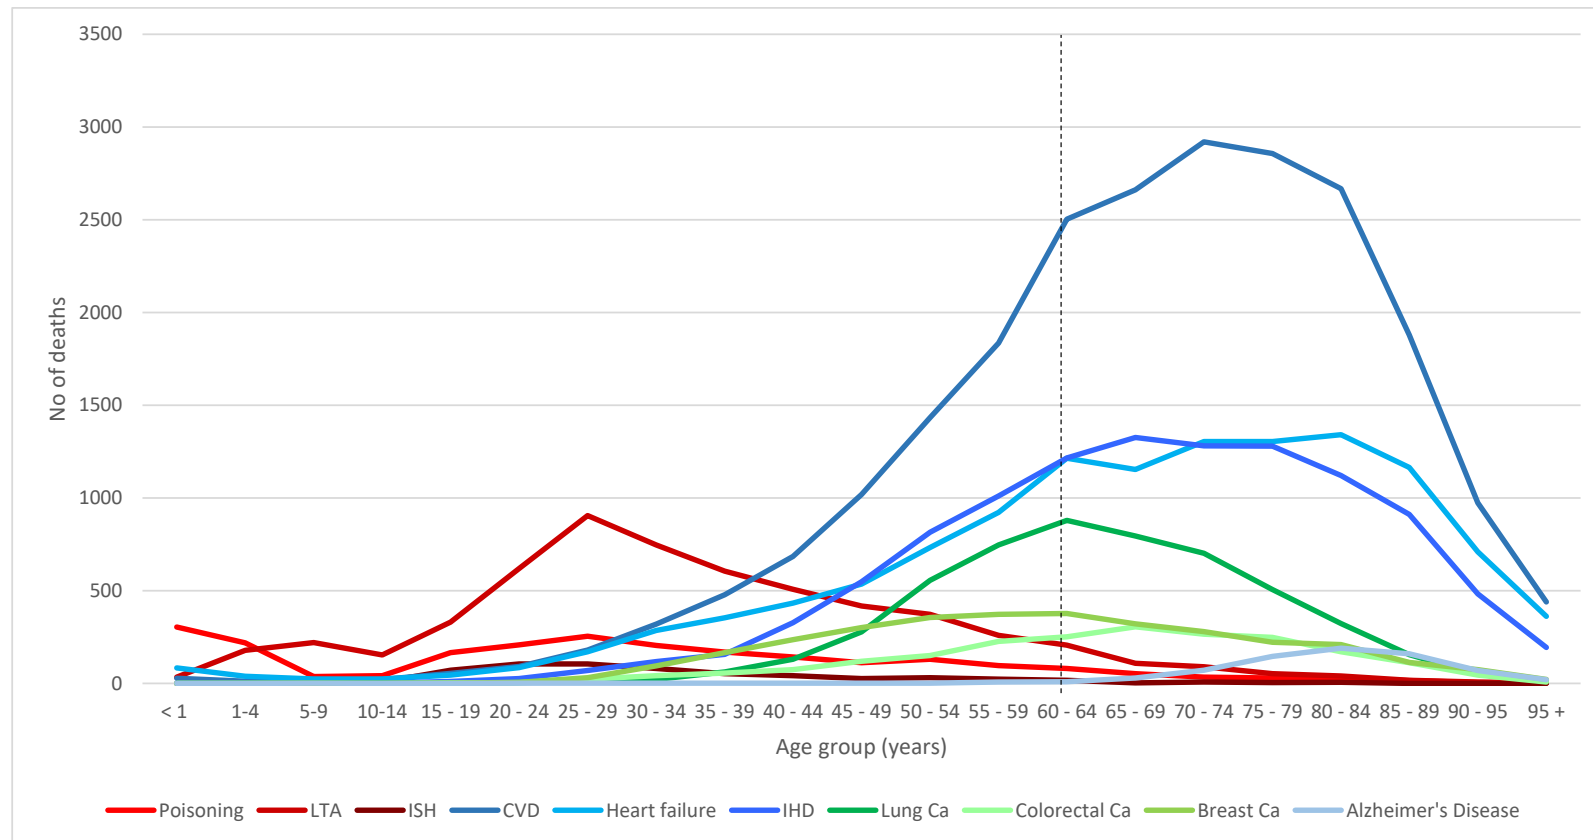

Supplementary fig 1: Age distribution of disease mortality in South Africa. (Dashed line: Life expectancy)
